1     **The *Drosophila* dystonia gene homolog *Neurocalcin* facilitates sleep**  
2             **by inhibiting a movement-promoting neural network**

3             Ko-Fan Chen, Angélique Lamaze, Patrick Krätschmer and James E.C. Jepson\*

4             Department of Experimental and Clinical Epilepsy, UCL Institute of Neurology, UK

5                             \*Correspondence to: [j.jepson@ucl.ac.uk](mailto:j.jepson@ucl.ac.uk)

6

7     **Abstract**

8     Primary dystonia is a hyperkinetic movement disorder linked to altered dopaminergic  
9     signaling and synaptic plasticity in regions of the brain involved in motor control.

10    Mutations in *HPCA*, encoding the neuronal calcium sensor Hippocalcin, are  
11    associated with primary dystonia, suggesting a function for Hippocalcin in regulating  
12    the initiation and/or maintenance of activity. However, such a role for Hippocalcin or  
13    Hippocalcin homologs has yet to be demonstrated in vivo. Here we investigate the  
14    cellular and organismal functions of the *Drosophila* Hippocalcin homolog  
15    Neurocalcin (NCA), and define a role for NCA in promoting sleep by suppressing  
16    nighttime hyperactivity. We show that NCA acts in a common pathway with the D1-  
17    type Dop1R1 dopamine receptor and facilitates sleep by inhibiting neurotransmitter  
18    release from a multi-component activity-promoting circuit. Our results suggest  
19    conserved roles for Hippocalcin homologs in modulating motor control through  
20    dopaminergic pathways, suppressing aberrant movements in humans and  
21    inappropriate nighttime locomotion in *Drosophila*.

22

## 23 **Introduction**

24 Primary dystonia is characterized by repetitive involuntary movements or sustained  
25 abnormal postures, and represents the third most common movement disorder after  
26 benign tremor and Parkinson's disease (Fahn, 1988; Wenning et al., 2005). Dystonia  
27 has been linked to altered neurotransmission and/or plasticity of circuits within the  
28 basal ganglia, a group of nuclei involved in action initiation and maintenance, as well  
29 as associated inputs/outputs (Calabresi et al., 2016; Karimi and Perlmutter, 2015;  
30 Pappas et al., 2015; Weisheit and Dauer, 2015). However, the molecular pathways  
31 underlying this disorder remain unclear.

32 Identifying genetic loci linked to hereditary forms of primary dystonia  
33 represents a useful strategy to uncover such pathways. Mutations in *GNAL*, encoding  
34  $G\alpha_{olf}$ , have been linked to primary dystonia (Fuchs et al., 2013), and since the  $G\alpha_{olf}$   
35 G-protein  $\alpha$ -subunit couples to D1-type dopamine receptors, this finding supports a  
36 link between dystonia and altered dopaminergic signaling (Karimi and Perlmutter,  
37 2015). Indeed, current models suggest that the basal ganglia regulate motor control  
38 through two distinct circuits, the direct and indirect pathways, that are defined by  
39 expression of D1- and D2-type type dopamine receptors respectively (Gerfen and  
40 Surmeier, 2011; Tecuapetla et al., 2016). These pathways antagonistically influence  
41 activity of large-scale brain networks (Lee et al., 2016), and an imbalance of direct  
42 versus indirect pathway signaling has been proposed to cause dystonia (Breakefield et  
43 al., 2008; Peterson et al., 2010; Tanabe et al., 2009; Yokoi et al., 2015). Mutations in  
44 *dTorsin*, the *Drosophila* homolog of the dystonia gene *TOR1A*, reduce dopamine  
45 levels by suppressing expression of the dopamine synthesis factor GTP  
46 cyclohydrolase (Wakabayashi-Ito et al., 2015; Wakabayashi-Ito et al., 2011), further  
47 linking dystonia to altered dopamine signaling.

48           Recent studies have identified an array of further loci linked to primary  
49 dystonia, including *THAP1*, *ANO3*, *KCTD17* and *HPCA* (Charlesworth et al., 2015;  
50 Charlesworth et al., 2012; Fuchs et al., 2009; Mencacci et al., 2015). However, in  
51 vivo data linking these genes to motor control and/or dopaminergic pathways is  
52 limited. Interestingly, mutations in the *Drosophila KCTD17* homologue *insomniac*  
53 result in reduced sleep (i.e increased movement), a phenotype that can be rescued by  
54 inhibiting dopamine synthesis (Pfeiffenberger and Allada, 2012; Stavropoulos and  
55 Young, 2011). Thus, we sought to examine whether other dystonia gene homologs in  
56 *Drosophila* also impacted sleep, beginning with the *Drosophila HPCA* homolog  
57 *Neurocalcin (Nca)*.

58           NCA and Hippocalcin (the *HPCA* gene product) act as neuronal calcium  
59 sensors, cytoplasmic proteins that bind to calcium via EF hand domains and  
60 translocate to lipid membranes through a calcium-dependent myristoylation switch  
61 (Burgoyne and Haynes, 2012). This switch modulates interactions with membrane-  
62 bound ion channels and receptors, altering target function or localization (Braunewell  
63 and Klein-Szanto, 2009; Burgoyne and Haynes, 2012). Missense mutations in *HPCA*  
64 have been linked to DYT2 primary isolated dystonia, which predominantly affects the  
65 upper limbs, cervical and cranial regions (Charlesworth et al., 2015). The index N75K  
66 mutation in *HPCA* alters a neutral asparagine residue in the second EF hand to a  
67 positively charged lysine, likely interfering with calcium binding in a loss-of-function  
68 manner.

69           Hippocalcin undertakes pleiotropic roles in mammalian neurons (Braunewell  
70 and Klein-Szanto, 2009), including acting as a calcium sensor to gate the slow  
71 afterhyperpolarisation (sAHP), a calcium-dependent potassium current, and  
72 facilitating NMDA receptor endocytosis during LTD (Jo et al., 2010; Tzingounis et

73 al., 2007). In *Drosophila*, NCA has previously been shown to be broadly expressed  
74 throughout the adult nervous system (Teng et al., 1994), yet the neuronal and  
75 organismal roles of NCA are unknown. Here we show that NCA is required to  
76 promote sleep by suppressing locomotor activity during the night. We demonstrate  
77 that NCA acts in a common pathway with the D1-type Dop1R1 dopamine receptor  
78 and identify a multi-component wake-promoting neuronal network in which NCA  
79 facilitates sleep by suppressing synaptic release. Thus, we propose that Hippocalcin  
80 homologs play conserved roles in regulating aspects of motor control.  
81

## 82 **Results**

### 83 **Generation of *Nca* knockout flies**

84 The *Drosophila* genome contains a single *HPCA* homolog, *Neurocalcin* (*Nca*).  
85 Hippocalcin and NCA share > 90% amino-acid identity (Figure 1 – figure supplement  
86 1A), suggesting conservation of function. To investigate the neuronal and behavioral  
87 roles of NCA we generated a *Nca* null allele by replacing the entire *Nca* locus  
88 (including 5' and 3' UTRs) with a mini-*white*<sup>+</sup> marker sequence using ends-out  
89 homologous recombination (Baena-Lopez et al., 2013) (Figure 1A, Figure 1 – figure  
90 supplement 1B-C). The mini-*white*<sup>+</sup> sequence is flanked by loxP sites, allowing  
91 removal by Cre recombinase and leaving single attP and loxP sites in place of the *Nca*  
92 locus (Figure 1A). As expected, no *Nca* mRNA expression was detected in  
93 homozygotes for the deleted *Nca* locus (Figure 1 – figure supplement 1D, E). Thus,  
94 we term this allele *Nca*<sup>KO</sup> (*Nca* knockout).

95

### 96 ***Nca* knockout flies exhibit reduced night sleep**

97 Following outcrossing into an isogenic *iso31* control background, *Nca*<sup>KO</sup>  
98 homozygotes were viable to the adult stage, allowing us to test whether NCA impacts  
99 locomotor control. To do so, we first used a high-throughput yet low resolution  
100 system, the *Drosophila* Activity Monitor (DAM) (Pfeiffenberger et al., 2010a), which  
101 counts locomotor activity via perturbations of an infrared beam intersecting a glass  
102 tube housing individual flies. Using this system, under 12 h light: 12 h dark  
103 conditions (12L: 12D, 25°C) we found that *Nca*<sup>KO</sup> males exhibited two distinct  
104 locomotor phenotypes. Firstly, reduced maximal locomotor activity in response to  
105 lights-off (also termed the startle response or masking) (Figure 1 – figure supplement  
106 2A, B). Secondly, increased locomotor activity during the night but not the day

107 (Figure 1 – figure supplement 2A, C, D). This later phenotype was suggestive of  
108 reduced night sleep. We therefore quantified sleep levels in *Nca*<sup>KO</sup> males and controls  
109 using a 5 min period of inactivity to define a sleep bout – the standard definition in  
110 the field (Pfeiffenberger et al., 2010b). Indeed, *Nca*<sup>KO</sup> males exhibited reduced night  
111 sleep but not day sleep relative to controls (Figure 1 – figure supplement 3).  
112 Interestingly, the impact of removing NCA on night sleep appeared further enhanced  
113 by shortening photoperiod, such that night (but not day) sleep was substantially  
114 reduced in *Nca*<sup>KO</sup> males under 8L: 16D (Figure 1B-D). Similarly to 12L: 12D, peak  
115 locomotor activity following lights-off was reduced in *Nca*<sup>KO</sup> males under 8L: 16D,  
116 and the number of beam breaks during the normally quiescent period of the night was  
117 increased (Figure 1 – figure supplement 4).

118 To obtain a higher resolution analysis of locomotor patterns in *Nca*<sup>KO</sup> flies we  
119 next utilized a video-tracking method - the DART (*Drosophila* Arousal Tracking)  
120 system (Faville et al., 2015). Continual video-monitoring of *Nca*<sup>KO</sup> males and *iso31*  
121 controls confirmed robust sleep loss in *Nca*<sup>KO</sup> males specifically during the night  
122 (Figure 1E-G) accompanied by significantly shortened sleep bouts (Figure 1 – figure  
123 supplement 5). By examining locomotor patterns in individual flies, we found that  
124 *Nca*<sup>KO</sup> males consistently displayed prolonged activity relative to controls following  
125 lights-off and frequent bouts of movement even in the middle of the night, a period of  
126 quiescence in *iso31* controls (Figure 1H, I). The velocity of locomotion in *Nca*<sup>KO</sup>  
127 males was also significantly increased relative to moving controls in the normally  
128 quiescent period of the night (4-12 h after lights-off), whereas peak velocity during  
129 the startle response to lights-off was reduced (Figure 1 – figure supplement 6), in  
130 agreement with data collected using the DAM system. Collectively, the above data

131 suggest that complete loss of NCA results in both locomotor deficits and profound  
132 nighttime hyperactivity, resulting in reduced peak levels of activity and night sleep.

133

### 134 **NCA is required in neurons to promote night sleep**

135 To identify the cellular substrates in which NCA acts to regulate locomotion and sleep  
136 we performed cell-specific knockdown of *Nca* expression using transgenic RNA  
137 interference (RNAi). NCA has been shown to be widely expressed in neuropil regions  
138 throughout the *Drosophila* brain (Teng et al., 1994). Thus, we initially examined  
139 neurons as a potential cellular candidate. We used three independent RNAi lines  
140 (*kk108825*, *hmj21533* and *jf03398*, termed *kk*, *hmj* and *jf* respectively) to reduce *Nca*  
141 expression in adult male neurons using the pan-neuronal *elav*-Gal4 driver. The *kk* and  
142 *jf* dsRNAs target a partially overlapping sequence of *Nca*, whereas *hmj* targets a  
143 distinct, non-overlapping upstream sequence (Figure 2 – figure supplement 1A). For  
144 each RNAi line, we confirmed reduced *Nca* expression using qPCR (Figure 2 – figure  
145 supplement 1B). Transcription of *Nca* occurs from promoter regions shared with the  
146 downstream locus *cg7646*, yet *cg7646* transcription was not affected by *Nca* RNAi  
147 (Figure 2 – figure supplement 1C), nor were any common off-target mRNAs  
148 predicted for the *kk*, *hmj* or *jf* dsRNA hairpins (data not shown). Importantly, under  
149 8L: 16D conditions, pan-neuronal expression of all three *Nca* RNAi lines specifically  
150 reduced night sleep in males as measured by the DAM system (Figure 2A-C, Figure 2  
151 – figure supplement 2). However, *Nca* knockdown did not result in a reduction in  
152 peak locomotor activity as observed in *Nca*<sup>KO</sup> males (Figure 2 – figure supplement 3).  
153 Thus, neuronal NCA predominantly impacts sleep/activity during the night, with  
154 NCA potentially acting in other cell types to regulate peak locomotor levels. We

155 therefore focused on elucidating the genetic pathways and neuronal circuits in which  
156 NCA acts to promote night sleep.

157 To test whether sleep loss caused by neuronal *Nca* knockdown flies was due to  
158 an indirect effect on the circadian clock, we examined whether *Nca* knockdown  
159 altered circadian patterns of locomotor activity under constant dark conditions (Figure  
160 2 – figure supplement 4A, B). Importantly, knockdown of *Nca* in neurons did not alter  
161 circadian rhythmicity (Figure 2 – figure supplement 4A, B), nor did *Nca* expression  
162 cycle in whole fly heads (Figure 2 – figure supplement C). Thus, it is unlikely that  
163 sleep loss caused by neuronal *Nca* knockdown is due to circadian clock dysfunction.  
164 We extended our initial findings in *Nca* knockdown males harbouring the pan-  
165 neuronal *elav*-Gal4 driver and found that night sleep loss due to neuronal *Nca*  
166 knockdown was also observed in adult virgin females (Figure 2 – figure supplement  
167 5), and in male flies expressing the *kk Nca* RNAi using distinct pan-neuronal (*nsyb*-  
168 Gal4) or broadly expressed (*insomniac*-Gal4) drivers (Figure 3A). In contrast,  
169 expression of the *kk Nca* RNAi in muscle cells did not alter night sleep in adult males  
170 (Figure 2 – figure supplement 6), supporting the premise that NCA acts in the nervous  
171 system to regulate sleep. Video tracking further confirmed that neuronal expression of  
172 *kk Nca* RNAi reduced night sleep (Figure 2D-F). Collectively, the above data  
173 demonstrate that NCA acts in neurons to promote night sleep in *Drosophila*. For  
174 simplicity, we use the *kk Nca* RNAi for all subsequent experiments, and refer to flies  
175 expressing *kk Nca* RNAi under *elav*-Gal4 as *Nca*<sup>KD</sup> (*Nca* knockdown). Given the  
176 similar results obtained using the DAM and DART systems for both *Nca*<sup>KO</sup> and  
177 *Nca*<sup>KD</sup> flies, we use DAM as a high-throughput method for all sleep measurements  
178 detailed below, which are performed in 8L: 16D conditions at 25°C.

179



180 **NCA acts in a common pathway with the Dop1R1 dopamine receptor**

181 In *Drosophila*, dopamine is a pro-arousal factor, with elevated dopaminergic  
182 neurotransmission strongly reducing sleep (Kume et al., 2005). Recent studies have  
183 shown that the pro-arousal effect of elevated dopamine is mediated by the D1-type  
184 Dop1R1 dopamine receptor (Liu et al., 2012; Ueno et al., 2012). Furthermore, both  
185 hypo- and hyper-dopaminergic signalling within the human basal ganglia has been  
186 proposed to underlie forms of primary dystonia (Breakefield et al., 2008). We  
187 therefore tested whether *Nca* promotes sleep in a common pathway with genes  
188 involved in dopaminergic signalling. Indeed, we found that heterozygosity for a null  
189 or strongly hypomorphic allele of the *Dop1R1* dopamine receptor (*Dop1R1*<sup>MI03085-</sup>  
190 <sup>GFST.2</sup>, a homozygous lethal MiMIC insertion) rescued night sleep loss in *Nca*<sup>KD</sup> flies  
191 (Figure 2G, H). Importantly, in both *elav-Gal4/+* and *kk/+* control backgrounds,  
192 heterozygosity for *Dop1R1*<sup>MI03085-GFST.2</sup> did not alter sleep levels (Figure 2G, H;  $p >$   
193 0.05, Kruskal-Wallis test with Dunn's post-hoc test). A similar epistatic interaction  
194 between *Nca* and *Dop1R1* was observed using a second, weaker *Dop1R1* allele  
195 (*Dop1R1*<sup>MI004437</sup>) (Figure 2 – figure supplement 7).

196 Mammalian Hippocalcin regulates cell-surface levels of NMDA receptors  
197 during LTD (Jo et al., 2010), and *Drosophila nmda receptor 1* (*dNR1*) mutants exhibit  
198 reduced sleep during the night (Tomita et al., 2015), similarly to *Nca* knockout and  
199 knockdown flies. However, in contrast to *Dop1R1*, we found no signatures of genetic  
200 interaction between *Nca* and *dNR1*, suggesting that these loci act in distinct pathways  
201 to promote sleep (Figure 2 – figure supplement 8).

202

203 **NCA acts in two distinct circuits to promote night sleep**

204 We next sought to delineate the neural circuits in which NCA functions to promote  
205 night sleep. Using transgenic RNAi, we performed an extensive screen of sleep  
206 relevant circuits defined by numerous *promoter*-Gal4 driver lines (Figure 3A, Figure  
207 3 – figure supplement 1). These include clock neurons, dopaminergic and other  
208 neurotransmitter-specific subtypes, fan-shaped body neurons, mushroom body (MB),  
209 and sensory neurons (Figure 3A) (Donlea et al., 2011; Joiner et al., 2006; Lamaze et  
210 al., 2017; Liu et al., 2014; Pitman et al., 2006; Seidner et al., 2015; Sitaraman et al.,  
211 2015). Given the genetic interaction between *Nca* and *Dop1R1*, we also utilised  
212 genomic enhancer elements in the *Dop1R1* locus to drive *Nca* knockdown in subsets  
213 of potential Dop1R1-expressing neurons (Figure 3A, Figure 3 – figure supplement 1)  
214 (Jenett et al., 2012; Jiang et al., 2016). However, in contrast to broadly expressed  
215 drivers (*elav*-, *nsyb*- and *inc*-Gal4), *Nca* knockdown in restricted neural subsets was  
216 insufficient to significantly reduce night sleep (Figure 3A, Figure 3 – figure  
217 supplement 1).

218 These results suggested a complex sleep-relevant circuit requirement for  
219 NCA. We therefore reduced NCA levels in multiple sub-circuits to test for a  
220 simultaneous role of NCA in distinct anatomical regions. Through this approach, we  
221 found that *Nca* knockdown using two *enhancer*-Gal4 lines (*R14A05* – an enhancer in  
222 the *single-minded* locus, and *R72C01* – an enhancer in the *Dop1R1* locus; see Figure  
223 3B for expression patterns) was sufficient to strongly phenocopy the effect of pan-  
224 neuronal *Nca* knockdown on night sleep (Figure 3C, D; compare Figure 3C with  
225 Figure 2A). For simplicity we refer to these drivers as *A05* and *C01* respectively.

226 The *A05* enhancer drives expression in approximately 70 neurons, as  
227 quantified using a fluorescent nuclear marker (Figure 3 – figure supplement 2A, B)  
228 that include a subset of MB neurons, a cluster of cell bodies adjacent to the anterior

229 ventrolateral protocerebrum (AVP), and two visual sub-circuits: optic lobe (OL) and  
230 anterior optic tubercle (AOTU) neurons (Figure 3B). *C01* drives expression in  
231 approximately 250 neurons (Figure 3 – figure supplement 2C, D) that include the  
232 MBs, neurons projecting to the MB  $\gamma$ -lobes, the antennal mechanosensory and motor  
233 center (AMMC) (Figure 3B) and the superior medial protocerebrum (SMP). Both  
234 drivers label additional cell bodies of unknown identity. The potential overlap of *A05*  
235 and *C01* in the MBs raised the possibility that sleep loss in *A05/C01* > *Nca* RNAi  
236 flies was due to strong NCA knockdown in neurons common to both the *A05* and *C01*  
237 enhancers. If so, driving *Nca* RNAi with two copies of either *A05* or *C01* should  
238 mimic sleep loss in *A05/C01* > *Nca* RNAi flies. However, this was not the case  
239 (Figure 4 – figure supplement 3). Thus, NCA is simultaneously required in two non-  
240 overlapping sub-circuits defined by the *A05* and *C01* enhancers.

241         Given that *C01* is a *Dop1R1* enhancer element, that *Nca* and *Dop1R1*  
242 genetically interact to regulate sleep (Figure 2G, H), and that Dop1R1 is highly  
243 expressed in the MBs (Lebestky et al., 2009), we tested whether the MBs were a  
244 constituent of the *C01* expression domain by swapping *C01* for the MB-specific  
245 driver *ok107* and measuring sleep in flies expressing *Nca* RNAi in both *A05* and MB  
246 neurons. Indeed, knockdown of *Nca* in both *A05* and MB neurons also specifically  
247 reduced night sleep (Figure 3 – figure supplement 4), albeit to a weaker degree  
248 compared to knockdown in *A05* and *C01* neurons (compare with Figure 3C, D). Thus,  
249 we conclude that the MBs are a component of a complex network defined by *C01*-  
250 Gal4 with additional, as yet undefined, neurons acting within both the *C01* and *A05*  
251 domains to regulate night sleep.

252

253 **NCA promotes sleep by suppressing synaptic output from a wake-promoting**  
254 **circuit**

255 We next assessed how NCA impacts excitability of *C01* and *A05* neurons. To do so,  
256 we expressed a genetically-encoded fluorescent indicator of neurotransmitter release,  
257 UAS-*synaptopHluorin* (*spH*) (Miesenbock, 2012), in *C01* and *A05* neurons of either  
258 wild type or *Nca*<sup>KD</sup> males. spH is localised to presynaptic neurotransmitter-containing  
259 vesicles and increases in fluorescence in a pH-dependent manner upon fusion of  
260 synaptic vesicles with the presynaptic membrane, providing an optical read-out of  
261 neurotransmitter release (Miesenbock, 2012). Intriguingly, we found that *Nca*  
262 knockdown significantly enhanced spH fluorescence in the MB  $\alpha/\beta$ -lobes and the  
263 AMMC but not in the MB  $\gamma$ -lobe region or the SMP (Figure 4).

264 Since neurotransmitter release is enhanced in subsets of *C01* and *A05* neurons  
265 following *Nca* knockdown, this suggested that NCA normally acts to inhibit synaptic  
266 output in these circuits. If sleep loss in *Nca* knockdown flies directly results from a  
267 loss of such inhibition in *C01* and *A05* neurons (thus enhancing neurotransmitter  
268 release), we predicted the following: firstly, that artificial activation of *C01* and *A05*  
269 neurons should be sufficient to promote locomotor activity (and thus sleep loss), and  
270 secondly, that silencing *C01* and *A05* neurons should suppress sleep loss in *Nca*  
271 knockdown flies. To test our first prediction, we enhanced the excitability of *C01* and  
272 *A05* neurons by expressing the temperature-sensitive channel TrpA1 in either  
273 neuronal subset or both and shifting flies from a non-activating temperature (22°C) to  
274 an activating temperature (27°C) sufficient to cause neural excitation through TrpA1-  
275 mediated cation influx (Hamada et al., 2008) (Figure 5A). At the non-activating  
276 temperature, over-expression of TrpA1 in either circuit or both did not alter sleep  
277 levels (Figure 5B). At the activating temperature, excitation of *A05* neurons did not

278 alter night sleep levels relative to controls (Figure 5C, D). In contrast, excitation of  
279 *C01* neurons profoundly reduced night sleep (Figure 5C, D) as well as day sleep  
280 (Figure 5C). Interestingly, simultaneous activation of *C01* and *A05* neurons further  
281 reduced night sleep but not day sleep relative to activation of *C01* neurons alone  
282 despite the lack of effect of *A05* neuron activation on sleep (Figure 5C, D).

283 To test our second prediction, we over-expressed a non-inactivating outward  
284 rectifying potassium channel (dORK $\Delta$ C2) in *C01* and *A05* neurons with and without  
285 *Nca* knockdown via RNAi. Here, expression of dORK $\Delta$ C2 is predicted to suppress  
286 neuronal firing by hyperpolarizing the resting membrane potential (Nitabach et al.,  
287 2002; Park and Griffith, 2006). Silencing *C01* and *A05* neurons with dORK $\Delta$ C2 in an  
288 otherwise wild type background did not alter day or night sleep levels (Figure 5E, F).  
289 However, consistent with our above prediction, dORK $\Delta$ C2 expression significantly  
290 suppressed night sleep loss due to *Nca* knockdown in *C01* and *A05* neurons (Figure  
291 5E, F). Thus, we propose that NCA promotes night sleep by limiting synaptic output  
292 from a multi-component activity-promoting circuit coordinately defined by subsets of  
293 the *C01*- and *A05*-Gal4 expression domains. Our results further suggest that the *C01*  
294 and *A05* circuits interact to suppress sleep, with *C01* neurons acting as a predominant  
295 pro-arousal circuit and *A05* neurons acting in a modulatory manner to enhance the  
296 impact of *C01* activation on night sleep.

297

298

299

## 300 **Discussion**

301 Previous work has demonstrated that *Drosophila* Neurocalcin (NCA), a member of  
302 the neuronal calcium sensor family, is widely expressed throughout the fly brain and  
303 localizes to synaptic regions (Teng et al., 1994). However, the neurobiological  
304 functions of NCA have remained unclear. Here we define a role for NCA in  
305 promoting night sleep and show that NCA acts via inhibiting synaptic output from a  
306 complex movement-promoting circuit.

307 Previous genetic screens have identified an array of sleep-promoting factors in  
308 *Drosophila* (Tomita et al., 2017). However, despite extensive circuit analyses, the  
309 activity of such proteins does not fully map onto known sleep-regulatory neurons, and  
310 the complete neural substrates in which these factors act have yet to be determined  
311 (Afonso et al., 2015; Rogulja and Young, 2012; Shi et al., 2014; Stavropoulos and  
312 Young, 2011; Tomita et al., 2015; Wu et al., 2014). Our results are consistent with  
313 these findings and offer a tentative explanation for the difficulties in defining circuit  
314 requirements for sleep-relevant proteins. We show that NCA activity is not required  
315 within a single cell-type or neuropil region to promote sleep. Instead, sleep-relevant  
316 NCA activity can largely be localised to *two* distinct domains of the *Drosophila*  
317 nervous system defined by the *A05*- and *C01*-Gal4 drivers. One relevant cell-type  
318 within these domains is the mushroom bodies (MBs), a known sleep-regulatory center  
319 (Joiner et al., 2006; Pitman et al., 2006; Sitaraman et al., 2015). However, the MBs  
320 only partially contribute to one of the two sleep-relevant domains, indicating that  
321 NCA acts in a dispersed network that likely incorporates several non-overlapping  
322 wake-promoting circuits.

323 Interestingly, whereas activation of *C01* neurons is sufficient to suppress  
324 sleep, activation of *A05* neurons reduces night but not day sleep only in the context of

325 *C01* neuron activation. We note that activation of *C01* neurons profoundly reduces  
326 sleep during both day and night periods, whereas only night sleep is impaired in flies  
327 with reduced NCA expression in *C01* and *A05* neurons. Based on these findings, we  
328 hypothesize that reduction of NCA in *C01* and *A05* neurons causes mild  
329 hyperexcitation, which in *C01* neurons alone is insufficient to modulate sleep but in  
330 both *C01* and *A05* neurons simultaneously causes an increase in network excitability  
331 sufficient to reduce night sleep. A selective inhibition of neurotransmitter release by  
332 NCA in subsets of *C01* and *A05* neurons is supported by our in vivo imaging data  
333 showing that *Nca* knockdown increases synaptic output in the MB  $\alpha/\beta$ -lobes and  
334 AMMC but not the MB  $\gamma$ -lobe region or the SMP. Since NCA is only partly required  
335 in the MBs, we consider it unlikely that increased synaptic output within the MBs and  
336 AMMC alone is sufficient to drive sleep loss in *Nca* knockdown flies. Rather, we  
337 propose that coincident hyperactivity of several sub-circuits within the *C01* and *A05*  
338 domains collectively drives night sleep loss. Temporal information encoded by light-  
339 sensing or circadian pathways may further demarcate the period in which NCA  
340 promotes sleep (i.e the night), with such inputs likely to be bypassed by ectopic  
341 activation of *C01* neurons, resulting in sleep loss across 24 h.

342         Since silencing of *C01* and *A05* neurons does not alter basal sleep, we suggest  
343 that these circuits are normally activated by an ethological stimulus absent during our  
344 experimental conditions. We further postulate that modulatory dopamine signalling  
345 through Dop1R1 promotes neural activity in wake-promoting *C01* neurons. These  
346 neurons are defined by a *Dop1R1* enhancer element, and thus it is likely that at least a  
347 subset of *C01* neurons express Dop1R1. Indeed, dopamine signalling via Dop1R1 has  
348 been shown to enhance synaptic transmission between antennal lobe projection  
349 neurons and MB neurons (Ueno et al., 2013). This model is attractive since reducing

350 such input could balance the increased synaptic release caused by *Nca* knockdown,  
351 providing an explanatory basis for the genetic interaction between *Nca* and *Dop1R1*.

352         How might NCA inhibit synaptic output from *C01* and *A05* neurons? The  
353 mammalian NCA homolog Hippocalcin acts pleiotropically in several pathways that  
354 control neuronal excitability and plasticity, facilitating NMDA receptor endocytosis  
355 during LTD and gating the slow afterhyperpolarisation, a calcium-activated potassium  
356 current controlling spike frequency adaptation that is thought to be mediated by a  
357 complex array of potassium channels (Andrade et al., 2012; Jo et al., 2010;  
358 Tzingounis et al., 2007). Recent data suggest that Hippocalcin also negatively  
359 regulates calcium influx through N-type voltage-gated calcium channels (Helassa et  
360 al., 2017). Given the strong homology between Hippocalcin and NCA, it is possible  
361 that NCA suppresses neurotransmitter release through similar pathways in *Drosophila*  
362 neurons, although the lack of genetic interaction between *Nca* and the *dNRI* NMDA  
363 receptor suggests that an enhancement of NMDA receptor levels is unlikely to  
364 significantly contribute to sleep loss in *Nca* knockout/knockdown flies.

365         Mutations in Hippocalcin also cause the movement disorder DYT2 primary  
366 isolated dystonia (Charlesworth et al., 2015). What is the common neurobiological  
367 link between dystonic movements in humans and sleep loss in *Drosophila*? We  
368 suggest that both phenotypes fundamentally reflect a dysregulation of motor control  
369 i.e when activity is initiated, and for how long such activity is maintained.

370 Hippocalcin/Neurocalcin homologs have the potential to act as molecular toggle  
371 switches, inhibiting sustained rapid-firing and neurotransmitter release in activity-  
372 promoting neurons via simultaneous modulation of potassium and calcium channel  
373 function (Helassa et al., 2017; Tzingounis et al., 2007). Mutations in these calcium  
374 sensors may thus result in prolonged bouts of synaptic output and corresponding



375 motor activity. We note that *insomniac*, another sleep-promoting gene in *Drosophila*,  
376 is homologous to the myoclonus dystonia-gene *KCTD17* (as well the paralogs *KCTD2*  
377 and *KCTD5*) (Li et al., 2017; Mencacci et al., 2015; Stavropoulos and Young, 2011).  
378 It will thus be intriguing to test if other dystonia gene homologs also promote sleep in  
379 *Drosophila*, and whether human dystonia and *Drosophila* sleep loss can thus be  
380 considered homologous phenotypes (or phenologs) linked to mutations in a conserved  
381 genetic network that functions to suppress inappropriate activity in both humans and  
382 flies (Lehner, 2013; McGary et al., 2010).  
383

## 384 **Materials and Methods**

### 385 **Fly husbandry**

386 Flies were maintained on standard fly food at constant temperature 25°C under 12 h:  
387 12 h light-dark cycles (12L: 12D). The following strains were obtained from the  
388 Bloomington and VDRC stock centers: kk108825 (v100625), hmj21533 (54814),  
389 jf03398 (29461), *Dop1RI*<sup>MI03085-GFSTF.2</sup> (59802), *Dop1RI*<sup>MI04437</sup> (43773), *ple*-Gal4  
390 (8848), *Chat*-Gal4 (6798), *vGlut*-Gal4 (26160), *GAD*-Gal4 (51630), *Ddc*-Gal4 (7010),  
391 *GMR*-Gal4 (1104), *Trh.1*-Gal4 (38388), *Tdc2*-Gal4 (9313), *C5*-Gal4 (30839), *ok107*-  
392 Gal4 (854) and *A502* (16130). The remaining lines obtained from the Bloomington  
393 stock center are part of the Janelia Flylight collection with identifiable prefixes:  
394 R23E10-Gal4, R55B01-Gal4, R52H12-Gal4, Hdc-Gal4 (R17F12-Gal4), R14A05-  
395 Gal4, R72B05-Gal4, R72B07-Gal4, R72B08-Gal4, R72B11-Gal4, R72C01-Gal4, and  
396 R72C02-Gal4. The following lines were gifts from laboratories of Kyunghye Koh:  
397 *elav*-Gal4, *nsyb*-Gal4, *tim*-Gal4 and *TUG*-Gal4; Joerg Albert: *nompC*-Gal4  
398 (Kamikouchi et al., 2009) and Nicolas Stavropoulos: *inc*-Gal4:2 (Stavropoulos and  
399 Young, 2011). *ppk*-Gal4 and *TrpA1*-CD-Gal4 were described previously (Zhong et  
400 al., 2012). *GMR-hid*, *tim*<sup>KO</sup> and *cry*<sup>02</sup> were previously described in (Lamaze et al.,  
401 2017). Except for *Ddc*-Gal4, *Trh.1*-Gal4, *Tdc2*-Gal4, *nompC*-Gal4 and *Hdc*-Gal4, all  
402 *Drosophila* strains above were either outcrossed five times into an isogenic control  
403 background (*iso31*) or insertion-free chromosomes were exchanged with the *iso31*  
404 line (*hmj21533*, *jf03398*, *Dop1RI*<sup>MI03085-G</sup>, *Dop1RI*<sup>MI04437</sup> and *NMDAR1*<sup>MI11796</sup>) before  
405 testing for sleep-wake activity behaviour. Note: R14A05-Gal4 was initially  
406 mislabelled as R21G01-Gal4 in Bloomington shipment. The clear mismatch between  
407 the image of R21G01>GFP in FlyLight database and our immunostaining data (A05,  
408 Fig3B) led us to clarify the identity of the line, as R14A05-Gal4, by sequencing

409 genomic PCR product using primers pair: pBPGw\_ampF: agggttattgtctcatgagcgg and

410 pBPGw\_Gal4R: ggcgcacttcggttttctt.

#### 411 **Generation of the *Nca*<sup>KO</sup> line**

412 Null alleles of *Nca* were generated using homologous recombination as described

413 previously (Baena-Lopez et al., 2013). Briefly, genomic DNA was extracted from 20

414 wild type flies (Canton S) using the BDGP buffer A-LiCl/KAc precipitation protocol

415 (<http://www.fruitfly.org/about/methods/inverse.pcr.html>). The 5' (Arm 1) and 3'

416 (Arm 2) genomic regions flanking the *Nca* coding sequence were PCR amplified via

417 high fidelity DNA polymerase (Q5 high-fidelity 2X master mix, M0492S, NEB) with

418 the following primers: NotI\_Arm1F1:gcggccgctaattgcagctctgcatcg,

419 NotI\_Arm1R1:gcgcccgcatgtaagaagcacgcaacc,

420 AscI\_Arm2F1:ggcgcgccttatgaccgttccaaaacacc,

421 AvrII\_Arm2R1:cctaggggctaaatacgttgaccaagc. The corresponding Arm1 and Arm2

422 fragments (~2.5kb) were gel purified (Wizard® SV Gel and PCR Clean-Up System,

423 A9281, Promega) and cloned into pCR-Blunt II-TOPO vector (Zero Blunt® TOPO®

424 PCR Cloning Kit, 450245, ThermoFisher Scientific), and subsequently sub-cloned via

425 NotI (R3189S, NEB) and AscI/AvrII digestion (R0558S and R0174S, NEB) and T4

426 ligation (M0202S, NEB) into pTV vector, a P-element construct containing the mini-

427 *white*<sup>+</sup> marker and UAS-*reaper* flanked by FRT and I-SceI sites (Baena-Lopez et al.,

428 2013). The sequence identifies of Arm 1 and Arm 2 fragments within the pTV vector

429 were verified via Sanger sequencing using the following primers: nca1\_f:

430 cagctctgcatcgcttttgt, nca1\_3\_f: ccctcgcgcatggtacttta, nca1\_r: agcgtcacataagttctcca,

431 nca1\_4\_f: tggacgaaaataacgatggtca, nca1\_5\_f: agactacttagccatgtttctact, nca1\_2\_f:

432 tgacgaagccacaattaaagagtg, nca1\_1\_f: gcaaccctgtcccttca,

433 nca2\_f: gaccgttccaaaacaccca, nca2\_3\_f: ttgttggtgccacgttttc, nca2\_r:  
434 acgtatgctccatgattcctct  
435 nca2\_4\_f: tgcaggctcggtaataatcaatgc, nca2\_5\_f: tcaatcgattggggccagg, nca2\_2\_f:  
436 ccttctccaggctcagcaaa, nca2\_1\_f: actctgattcgataagattagcc. Donor lines containing  
437 pTV vector with Arm1 and Arm2 homologous fragments (pTV\_nca1+2) were then  
438 generated via embryonic injection and random P-element mediated genomic  
439 insertions (Bestgene, inc.). To initiate homologous recombination between  
440 pTV\_nca1+2 and the endogenous *Nca* locus, donor lines were crossed to *yw*; *hs-flp*,  
441 *hs-I-SceI/CyO* and the resulting larvae were heat shocked at 48 h and 72 h after egg  
442 laying for 1 h at 37°C. Around 200 female offspring with mottled/mosaic red eyes  
443 were crossed in pools of three to *ubiquitin-Gal4[3xP3-GFP]* males to remove  
444 nonspecific recombination events (via *UAS-reaper*-mediated apoptotic activity). The  
445 crossings were flipped once over and the progeny (~12000 adults) was screened for  
446 the presence of red-eyed and GFP-positive flies. Three independent GFP<sup>+</sup> red-eyed  
447 lines (*ko1*, *ko2*, and *ko3*) were identified. The exchange of endogenous *Nca* locus with  
448 pTV\_nca1+2 fragments was confirmed by detecting a 2.6 kb PCR product (Figure 1  
449 figure supplement 1C) in the genomic DNA samples of the above three lines (pre-  
450 digested by *EcoRI/NotI*) using the following primer pairs: ncaKO-F2:  
451 tgggaattgactgatacagcct; ncaKO-R2: ggcactacggtacctgcat. ncaKO-F2 matches to the  
452 region between 24 bp and 2 bp upstream of Arm1 and ncaKO-R2 overlaps with attP  
453 site (Figure 1A). The absence of endogenous *Nca* mRNA in *ko1* flies was confirmed  
454 by standard and quantitative RT-PCR (Figure 1 figure supplement 1D; see also the  
455 below RNA section). The *min-white*<sup>+</sup> cassette and majority of pTV vector sequences  
456 were further removed from the *ko1* genome via Cre-loxP recombination (Figure 1A).  
457 This “Cre-out” strain was then backcrossed five times to a *Nca*<sup>A502</sup> line (where A502

458 is a P-element insertion 2 kbp upstream of the *Nca* CDS) that was outcrossed  
459 previously into the *iso31* background (see Fly husbandry section). Before testing for  
460 changes in sleep/wake behaviour, the resulted line, termed *Nca* knockout (*Nca*<sup>KO</sup>),  
461 was lastly verified by sequencing a 576 bp genomic PCR product (using primer pair:  
462 *nca1\_5\_f* and *nca2\_r*), confirming the absence of *Nca* CDS sequence and the insertion  
463 an attP site in the *Nca* locus.

#### 464 **RNA extraction and Quantitative PCR**

465 For RNA extractions, 10-20 fly heads per genotype were collected with liquid  
466 nitrogen and dry ice. Total RNA was extracted using TRIzol™ reagent following  
467 manufacturer's manual (Thermo Fisher Scientific). cDNA was reverse transcribed  
468 from 250 or 500 ng of DNase I (M0303S, NEB) treated RNA via MMLV RT  
469 (M170A, Promega). A set of five or six standards across 3125-fold dilution was  
470 prepared from the equally pooled cDNA of all genotypes in each experiment.  
471 Triplicated PCR reactions were prepared in 96-well or 384-well plates for standards  
472 and the cDNA sample of each genotype (20 to 40 fold dilution) by mixing in Power  
473 SYBR Green Master Mix (Thermo Fisher Scientific) and the following primer sets:  
474 *ncaqF2*: acagagttcacagacgctgag, *ncaqR2*: ttgctagcgtcaccatattggg; *cg7646F*:  
475 *gcctttcgaatgtacgatgtcg*, *cg7646R*: cctagcatgtcataaattgcctgaac or  
476 *rp49F*:cgatatgctaagctgtcgcaca, *rp49R*: cgcttggttcgatccgtaacc. PCR reactions were  
477 performed in Applied Biosystems StepOne (96-wells module) or QuantStudio 6Flex  
478 instruments (384 wells module) using standard thermocycle protocols. Melting curve  
479 analysis was also performed to evaluate the quality of the PCR product and avoid  
480 contamination. The Ct values were exported as csv files and a standard curve between  
481 Ct values and logarithm of dilution was calculated using the liner regression function  
482 in Graphpad. The relative expression level for *Nca*, *cg7646* and *rp49* of each sample

483 were estimated by interpolation and anti-logarithm. The expression levels of *Nca* and  
484 *cg7646* for each genotype were further normalized to their respective average *rp49*  
485 expression level. Statistical differences between the normalized expressions levels of  
486 each genotype were determined by Mann-Whitney test or Kruskal-Wallis test with  
487 Dunn's post-hoc test using Graphpad software.

#### 488 **Sleep-wake behavioral analysis**

489 Three to five days old male or virgin female flies were collected and loaded into glass  
490 tubes containing 4% sucrose and 2% agar (w/v). Sleep-wake behavior was recorded  
491 using the *Drosophila* Activity Monitor (DAM, TriKinetics, inc.) system or  
492 *Drosophila* Arousal Tracking (DART, BFKlab) system for 3 days in the designated  
493 LD regime (L12: D12 or L8: D16) at 25°C. Behavioral recordings from the third day  
494 of the given LD regime were then analyzed. All flies were entrained to 12L: 12D  
495 prior to entering designated LD regimes. For ectopic activation experiments involving  
496 *UAS-TrpA1*, flies were cultured in 18°C during development and then entrained to  
497 L8: D16 at 22°C before entering L8: D16 condition at 27°C. *Drosophila* activity (or  
498 wake) is measured by infra-red beam crosses in DAM or by direct movement tracking  
499 in DART. Sleep is defined by 5 minutes of inactivity (where inactivity is defined as  
500 no beam crosses during 1 min in the DAM or less than 3 mm movement in 5 s in  
501 DART). The csv output files with beam crosses (DAM) or velocity data (DART)  
502 were processed by a customized Excel calculators (Supplementary file 1) and R-  
503 scripts ([https://github.com/PatrickKratsch/DAM\\_analysR](https://github.com/PatrickKratsch/DAM_analysR)) to calculate the following  
504 parameters for individual flies: *Onset and offset of each sleep bout, sleep bout length,*  
505 *day and night sleep minutes, daily total sleep minutes, and daily sleep profile* (30  
506 minutes interval). An established MATLAB® based tool, Flytoolbox, was used for  
507 circadian rhythmicity analysis (Levine et al., 2002a, b). Briefly, the strength of

508 rhythmicity (RI) was estimated using the height of the third peak coefficient in the  
509 auto-correlogram calculated for the activity time series of each fly. Rhythmic  
510 Statistics values were then obtained from the ratio of the RI value to the 95%  
511 confidence interval for the correlogram ( $2/\sqrt{N}$ , where N is the number of  
512 observations, which correlatively increase with the sampling frequency), in order to  
513 determine statistical significance of any identified period ( $RS \geq 1$ )

#### 514 **Immunohistochemistry and confocal microscopy**

515 Adult male *R72C01 > CD8::GFP* and *R21G01 > CD4::tdTomato* flies were  
516 anesthetized in 70% ethanol before brains were dissected in PBT (0.1M phosphate  
517 buffer with 0.3% TritonX100) and collected in 4% paraformaldehyde/PBT on ice.  
518 The fixation was then performed at room temperature for 15 min before washing 3  
519 times with PBT. The brain samples were blocked using 5% goat serum/PBT for 1 h at  
520 room temperature before incubation with primary antibodies. The samples were  
521 washed 6 times with PBT before incubated with Alexa Fluor secondary antibodies in  
522 5% goat serum/PBT at 4°C over 24 h. After washing 6 times with PBT, the samples  
523 were mounted in SlowFade Gold antifade reagent (S36936, Thermo Fisher Scientific)  
524 on microscope slides and stored at 4°C until imaged using an inverted confocal  
525 microscope Zeiss LSM 710. Primary antibody concentrations were as follows: mouse  
526 anti-nc82 (Developmental Studies Hybridoma Bank) - 1:200; rabbit anti-GFP  
527 (Invitrogen) - 1:1000; rabbit anti-dsRED (Clontech) - 1:2000. Alexa Fluor  
528 secondaries (Invitrogen) were used as follows: Alexa Fluor 647 goat anti-mouse IgG -  
529 1:500, Alexa Fluor 488 goat anti-rabbit IgG - 1:2000, Alexa Fluor 555 goat anti-rabbit  
530 IgG - 1:2000. For quantification of nuclei number in *C01 > red-stinger* and *A05 >*  
531 *red-stinger* brains, unstained Red-Stinger fluorescence was captured via confocal  
532 microscopy. DAPI (Sigma Aldrich) was used to counterstain nuclei (at a dilution of

533 1:5000). The number of Red-Stinger-positive nuclei in each brain was subsequently  
534 quantified using the ImageJ 3D Objects Counter tool, with a variable threshold used  
535 to incorporate all of the visible Red-Stinger-positive nuclei.

### 536 **Synapto-pHluorin imaging**

537 Synaptic activity of C01/A05 neurons was monitored in *ex vivo* fly brains using UAS-  
538 super-eclipse-synaptoHluorin construct (UAS-*spH*) (Miesenbock, 2012). Adult male  
539 *C01/A05 > UAS-spH* or *C01/A05 > UAS-spH, kk* flies were housed in normal  
540 behaviour tubes (see behaviour analysis section) and entrained for 3 days in L8: D16  
541 condition at 25°C. Individual flies of either genotype were carefully captured between  
542 ZT9 and ZT11 and fly brains were immediately dissected in HL3 *Drosophila* saline  
543 (70 mM NaCl, 5 mM KCl, 1.5 mM CaCl<sub>2</sub>, 20 mM MgCl<sub>2</sub>, 10 mM NaHCO<sub>3</sub>, 5 mM  
544 Trehalose, 115 mM Sucrose and 5 mM HEPES, pH 7.2) at room temperature. Fly  
545 brains were transferred into 200 µl HL3 in a poly-lysine treated glass bottom dish (35  
546 mm, 627860, Greiner Bio-One) before imaging using an inverted confocal Zeiss LSM  
547 710 microscope (20x objective with maximum pinhole). Three to five image stacks  
548 (16 bits) were taken within two minutes to minimise tissue degradation and to cover  
549 the depth of all spH-positive anatomical regions. Z-projections of the image stacks of  
550 each brain were generated by ImageJ software before the fluorescent intensity of the  
551 indicated neuropil centres was quantified using free drawn ROIs. Background  
552 fluorescence measured by the same ROIs from areas with no brain tissue was then  
553 subtracted to obtain the final fluorescent value. Mean fluorescent values of the  
554 indicated neuropil regions in each hemisphere were calculated and compared between  
555 genotypes. The statistical difference was determined by Mann-Whitney U-test using  
556 Graphpad software.

### 557 **Bioinformatics**



558 Conservation of amino acid residues between *Drosophila* Neurocalcin and human  
559 Hippocalcin was determined using ClustalW2 software for multiple sequence  
560 alignment. Amino-acid identity and similarity was visualised using BOXSHADE.  
561  
562  
563

564 **Acknowledgements**

565 We thank Jack Humphrey for performing initial work on *Neurocalcin* knockdown  
566 flies, and Kyunghye Koh and Simon Lowe for helpful comments on the manuscript.

567 This study was supported by the Wellcome Trust (Synaptopathies strategic award  
568 [104033]), and by the MRC [New Investigator Grant MR/P012256/1]. P.K is  
569 supported by a Wellcome Trust Neuroscience PhD studentship.

570

571 **Competing interests**

572 The authors have no financial or non-financial competing interests.

## 573 **Figures and Figure legends**

## Figure 1

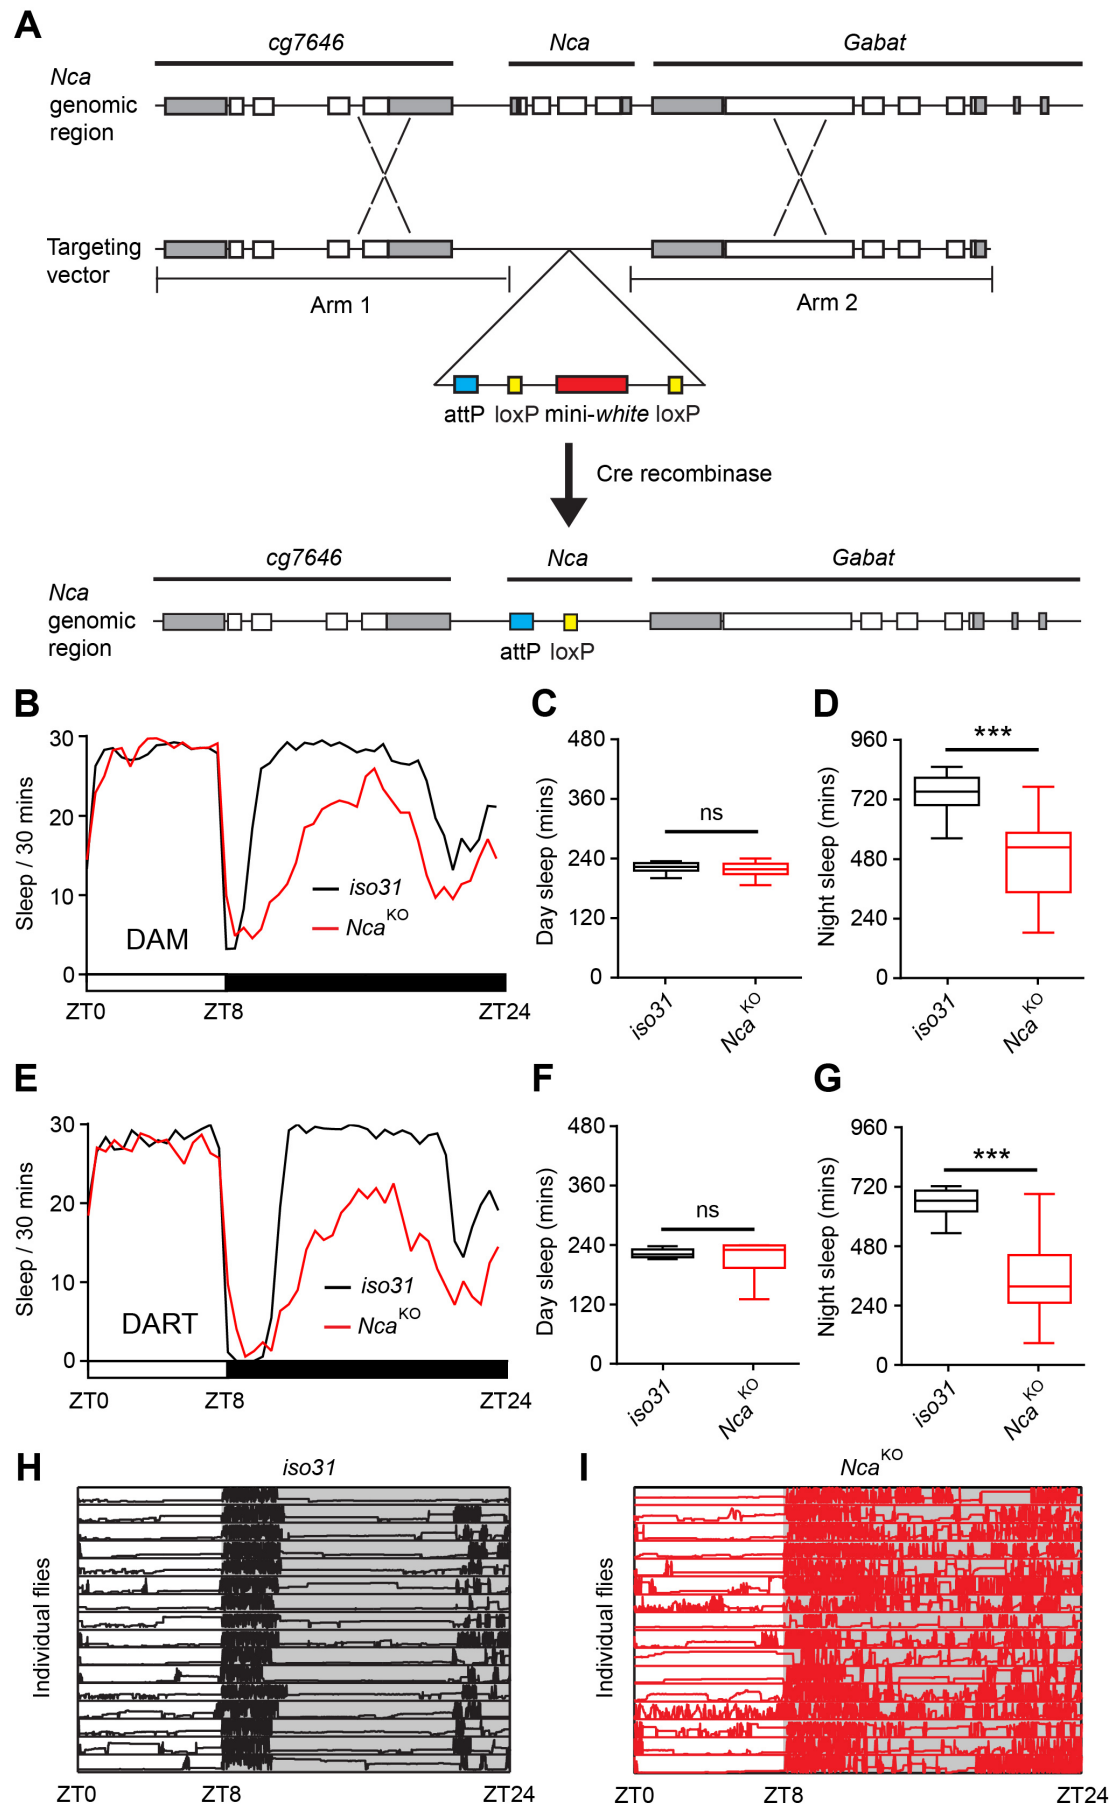

575 **Figure 1.** *Neurocalcin* (*Nca*) knockout flies exhibit enhanced night activity and  
576 reduced sleep. (A) Schematic illustration of the procedure used to generate a *Nca*  
577 knockout allele. Homologous arms upstream (Arm 1) and downstream (Arm 2) of the  
578 *Nca* locus are indicated. Following homologous recombination, the endogenous *Nca*  
579 locus is replaced by a cassette containing the mini-*white* selection marker (red bar),  
580 and attP (blue bar) and loxP sites (yellow bars). The mini-*white* cassette was  
581 subsequently removed via Cre-loxP recombination. (B) Mean sleep levels in 8L: 16D  
582 conditions for *Nca*<sup>KO</sup> adult males and *iso31* controls measured using the *Drosophila*  
583 Activity Monitor (DAM). (C-D) Median day (C) and night (D) sleep levels in the  
584 above genotypes. (E) Mean sleep levels in 8L: 16D conditions for *Nca*<sup>KO</sup> adult males  
585 and *iso31* controls measured by the video-based *Drosophila* ARousal Tracking  
586 system (DART). (F-G) Median day (F) and night (G) sleep levels in the above  
587 genotypes. Data are presented as Tukey box plots. The 25<sup>th</sup>, Median, and 75<sup>th</sup>  
588 percentiles are shown. Whiskers represent 1.5 x the interquartile range. Identical  
589 representations are used in all subsequent box plots. B-D: n = 32 per genotype; E-G: n  
590 = 16. (H-I) The longitudinal movement for individual *iso31* (H) and *Nca*<sup>KO</sup> (I) flies  
591 are shown as rows of traces plotting vertical position (Y-axis) over 24 h (X-axis)  
592 under 8L: 16D condition. \*\*\*p < 0.001, ns - p > 0.05, Mann-Whitney U-test.  
593  
594

## Figure 1 figure supplement 1

**A**

|         |     |                                                                 |
|---------|-----|-----------------------------------------------------------------|
| Hs HPCA | 1   | MGKQNSKLRPEMLQDLRENTFSELELQEWYKGFLLKDCPGLLNVDDEFKKIYANFFPYGD    |
| Dm NCA  | 1   | MGKQNSKLRPEVLEDLQNTFETDAELQEWYKGFLLKDCPSGHLISVVEEFKKIYGNFFPYGD  |
|         |     |                                                                 |
| Hs HPCA | 61  | ASKFAEHVFRITFDTNSDGTIDFREFTI ALSVTSRGRLEQKLMWAFSMYDLDGNGYISRRE  |
| Dm NCA  | 61  | ASKFAEHVFRITFDANCGDGTIDFREFLCALSVTSRGRKLEQKLMWAFSMYDLDGNGYISRQE |
|         |     |                                                                 |
| Hs HPCA | 121 | MLEIVQAIYKMVSSVMKMPEDESTPEKRTEKIFROMDTNNDGKLSLEEFTRGAKSDPSIV    |
| Dm NCA  | 121 | MLEIVTAIYKMVGSVMKMPEDESTPEKRTEKIFROMDRNKDGLSLEEFTRGAKSDPSIV     |
|         |     |                                                                 |
| Hs HPCA | 181 | RLLQCDPSSASQF                                                   |
| Dm NCA  | 181 | RLLQCDPSSH---                                                   |

**B**

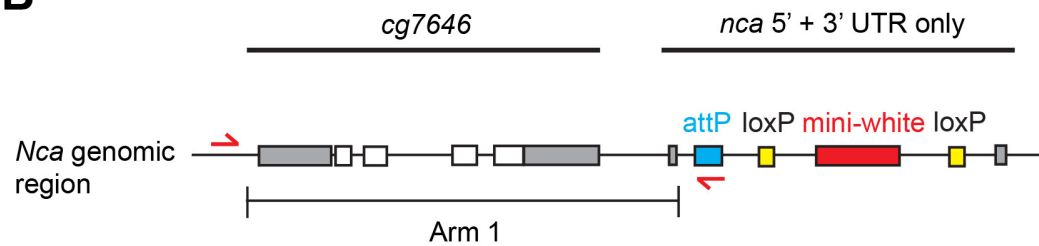

**C**

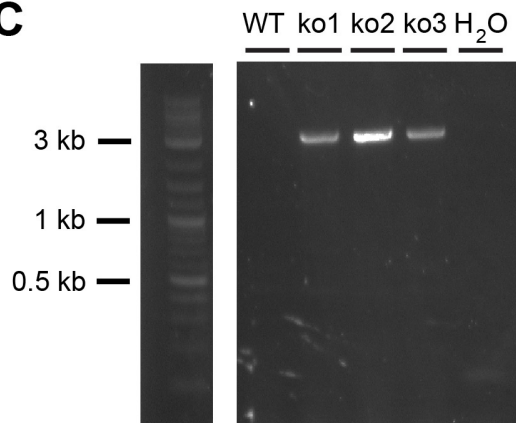

**D**

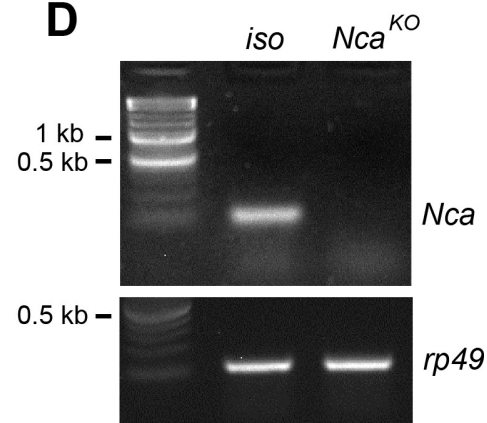

**E**

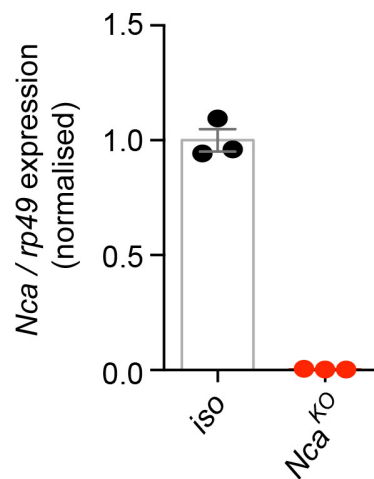

596 **Figure 1 supplemental figure 1.** Generation of the *Nca* knockout allele. (A)  
597 Hippocalcin and Neurocalcin are highly conserved neuronal calcium sensors. Amino-  
598 acid alignment of human (Hs) Hippocalcin (HPCA) and *Drosophila* (Dm)  
599 Neurocalcin (NCA). Identical amino-acids are shaded in black, with functionally  
600 similar amino-acids shaded in grey. Total homology between Hippocalcin and  
601 Neurocalcin is > 90%. (B-C) PCR validation of homologous recombination events.  
602 Correct recombination was verified using primers designed to the attP site and  
603 upstream of the neighbouring locus *cg7646* (B), which will only generate a ~ 3 kb  
604 product following homologous recombination between the targeting vector and the  
605 *Nca* locus (C). Three independent targeting events (ko1-3) are shown in (C), one of  
606 which was selected for mini-*white* removal as described in Figure 1. WT: wild-type  
607 genome lacking an attP site neighbouring the *cg7646* locus. (D-E) No *Nca* mRNA  
608 was detected in *Nca*<sup>KO</sup> using either standard RT-PCR (D) or quantitative RT-PCR (E;  
609 n = 3 qPCR reactions for *iso31* control and *Nca*<sup>KO</sup> flies).  
610  
611

## Figure 1 figure supplement 2

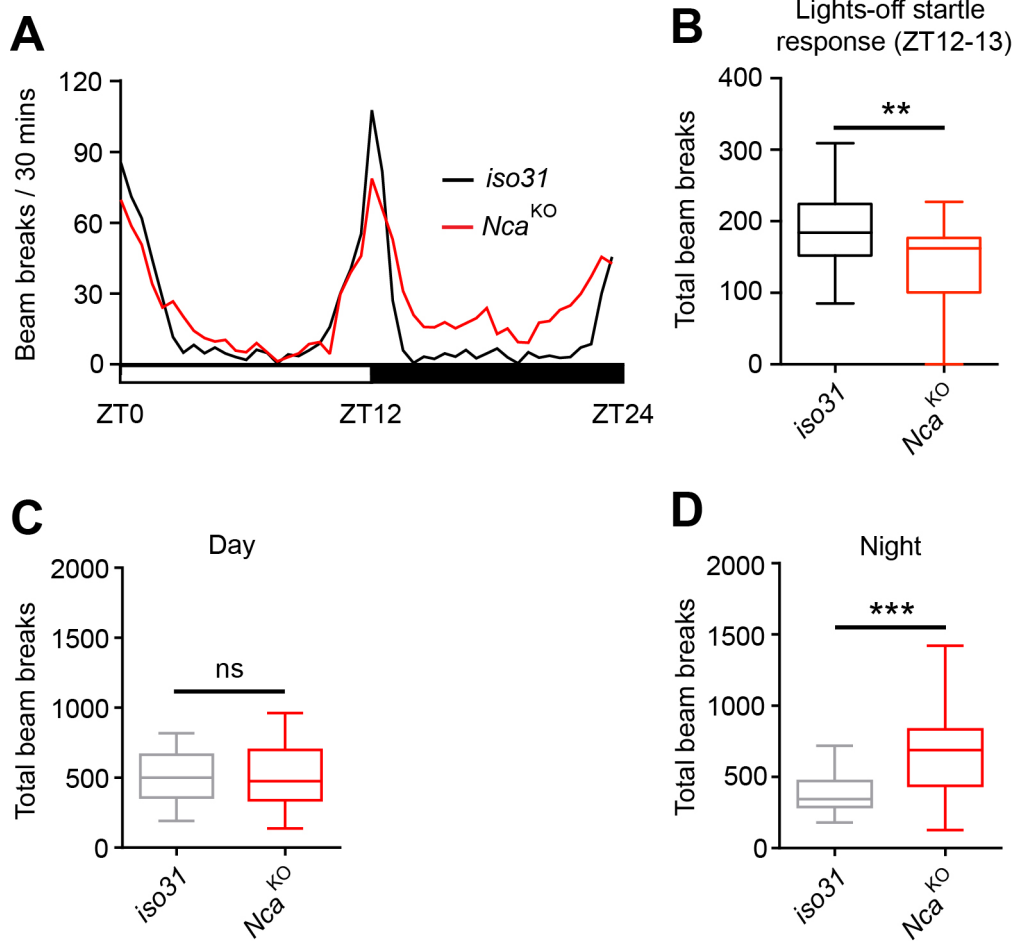

612

613

614 **Figure 1 supplemental figure 2.** Reduced startle response and elevated night time

615 locomotor activity in *Nca*<sup>KO</sup> flies. (A) Mean level of locomotor activity (beam

616 crosses) for *iso31* control and *Nca*<sup>KO</sup> males under 12L: 12D conditions. (B) Median

617 beam breaks during the hour immediately following lights-off (ZT12-13). The rapid

618 light-dark transition initiates a startle response and thus elevated locomotor activity,

619 the degree of which is reduced in *Nca*<sup>KO</sup> males. (C-D) Median total beam crosses

620 during the day (C) and night (D) periods. Locomotor activity is significantly increased

621 in *Nca*<sup>KO</sup> males during the night but not the day. n = 32 per genotype. \*\*p < 0.01,

622 \*\*\*p < 0.001, ns – p > 0.05, Mann-Whitney U-test.

623



### Figure 1 figure supplement 3

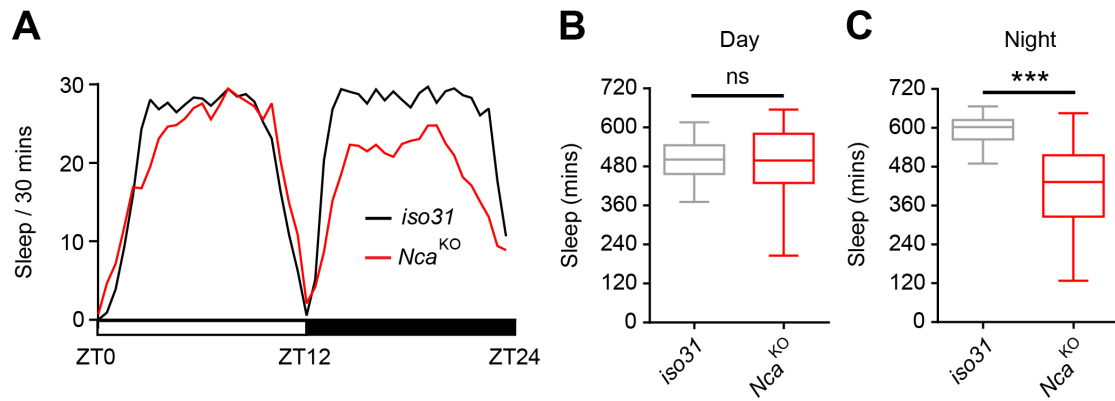

624

625

626 **Figure 1 supplemental figure 3.** Night time sleep loss in *Nca*<sup>KO</sup> flies. (A) Mean sleep  
627 level of *iso31* control and *Nca*<sup>KO</sup> flies under 12L: 12D conditions. (B-C) Median total  
628 day (B) and night (C) sleep in *iso31* control and *Nca*<sup>KO</sup> flies. Night sleep is  
629 significantly reduced in *Nca*<sup>KO</sup> flies compared to controls. n = 32 per genotype.

630 \*\*\*p < 0.001, ns – p > 0.05, Mann-Whitney U-test.

631

## Figure 1 figure supplement 4

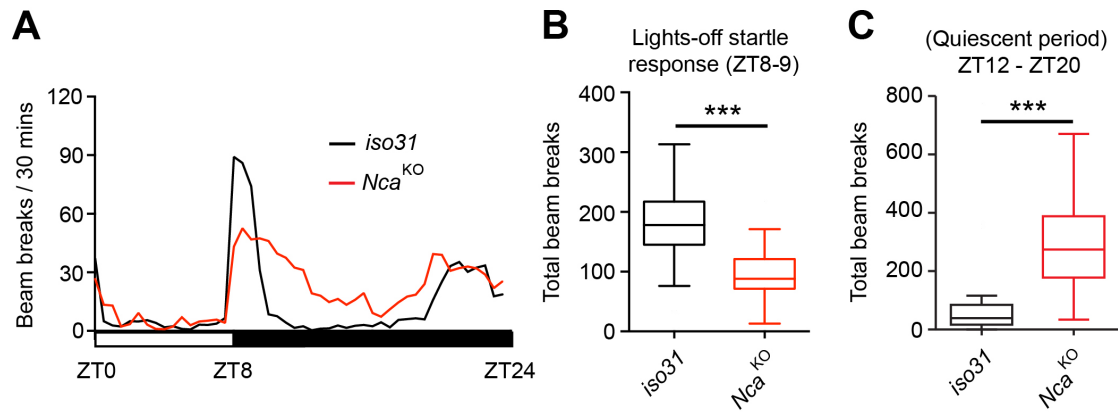

632

633

634 **Figure 1 supplemental figure 4.** Reduced startle response and elevated night time

635 locomotor activity in *Nca*<sup>KO</sup> flies under 8L: 16D conditions. (A) Mean level of

636 locomotor activity (beam crosses) for *iso31* control and *Nca*<sup>KO</sup> males. (B) Median

637 beam breaks during the hour immediately following lights-off (ZT8-9). (C-D) Median

638 total beam crosses during the normally quiescent period of the night (ZT12-20). n =

639 16 per genotype. \*\*\*p < 0.001, Mann-Whitney U-test.

640

641

642

## Figure 1 figure supplement 5

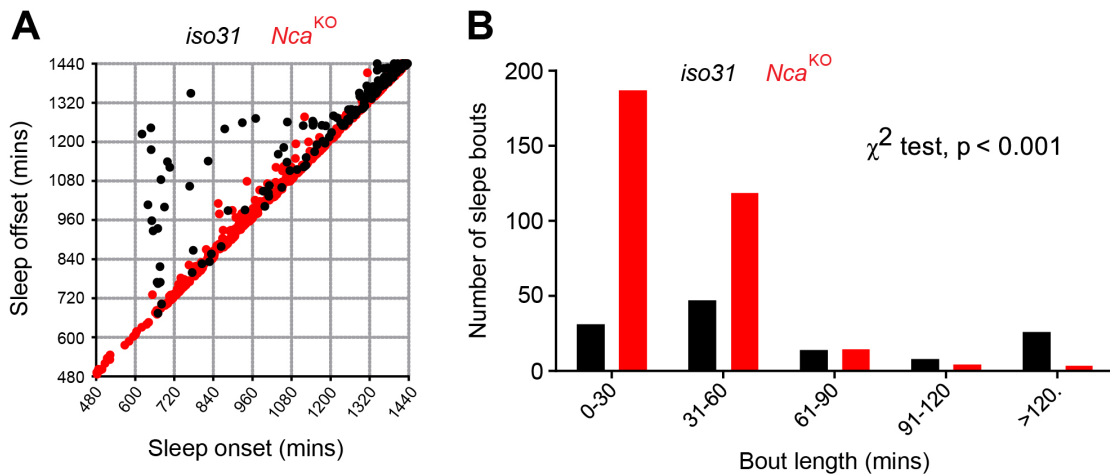

643

644

645 **Figure 1 supplemental figure 5.** Reduced long sleep bouts in *Nca<sup>KO</sup>* flies.

646 (A) Following detailed fly movement detection using the DART system, individual

647 sleep bout durations were further estimated using a custom-made R program and

648 visualised by plotting sleep bout offset against onset for night sleep bouts in control

649 *iso31* and *Nca<sup>KO</sup>* adult males under 8L: 16D conditions. In control flies, longer sleep

650 bouts initiated early during the night (note the black dots deviating from the

651 diagonal), which are largely absent in *Nca<sup>KO</sup>* adult males (red dots).  $n = 16$  for each

652 genotype. (B) Distribution of sleep bout lengths in *Nca<sup>KO</sup>* and control adult males.

653 Note the significant shift towards shorter sleep bout lengths in *Nca<sup>KO</sup>* flies (*Nca<sup>KO</sup>* vs.

654 *iso31* control:  $\chi^2$ ,  $df$ : 85.59, 4,  $p < 0.001$ ).

655

656

## Figure 1 figure supplement 6

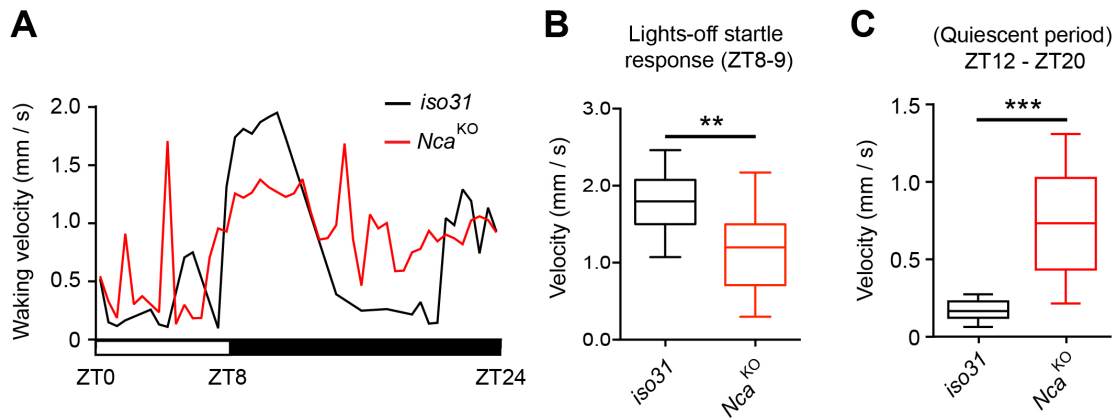

657

658

659 **Figure 1 supplemental figure 6.** Detailed tracking reveals increased locomotor  
660 velocity during the night and reduced velocity during the startle response to lights-off  
661 in *Nca<sup>KO</sup>* flies. (A) Mean waking locomotor velocity in *iso31* control and *Nca<sup>KO</sup>* adult  
662 males under L8: 16D condition. (B) Locomotor velocity is significantly reduced in  
663 *Nca<sup>KO</sup>* flies following the startle response to lights-off (ZT8-ZT9). (C) *Nca<sup>KO</sup>* flies  
664 exhibit a significant increase in locomotor velocity between ZT12-ZT20 compared to  
665 controls – a normally quiescent period.  $n = 16$  per genotype.  $**p < 0.01$ ,  $***p <$   
666  $0.001$ , Mann-Whitney U-test.

667

668

669

## Figure 2

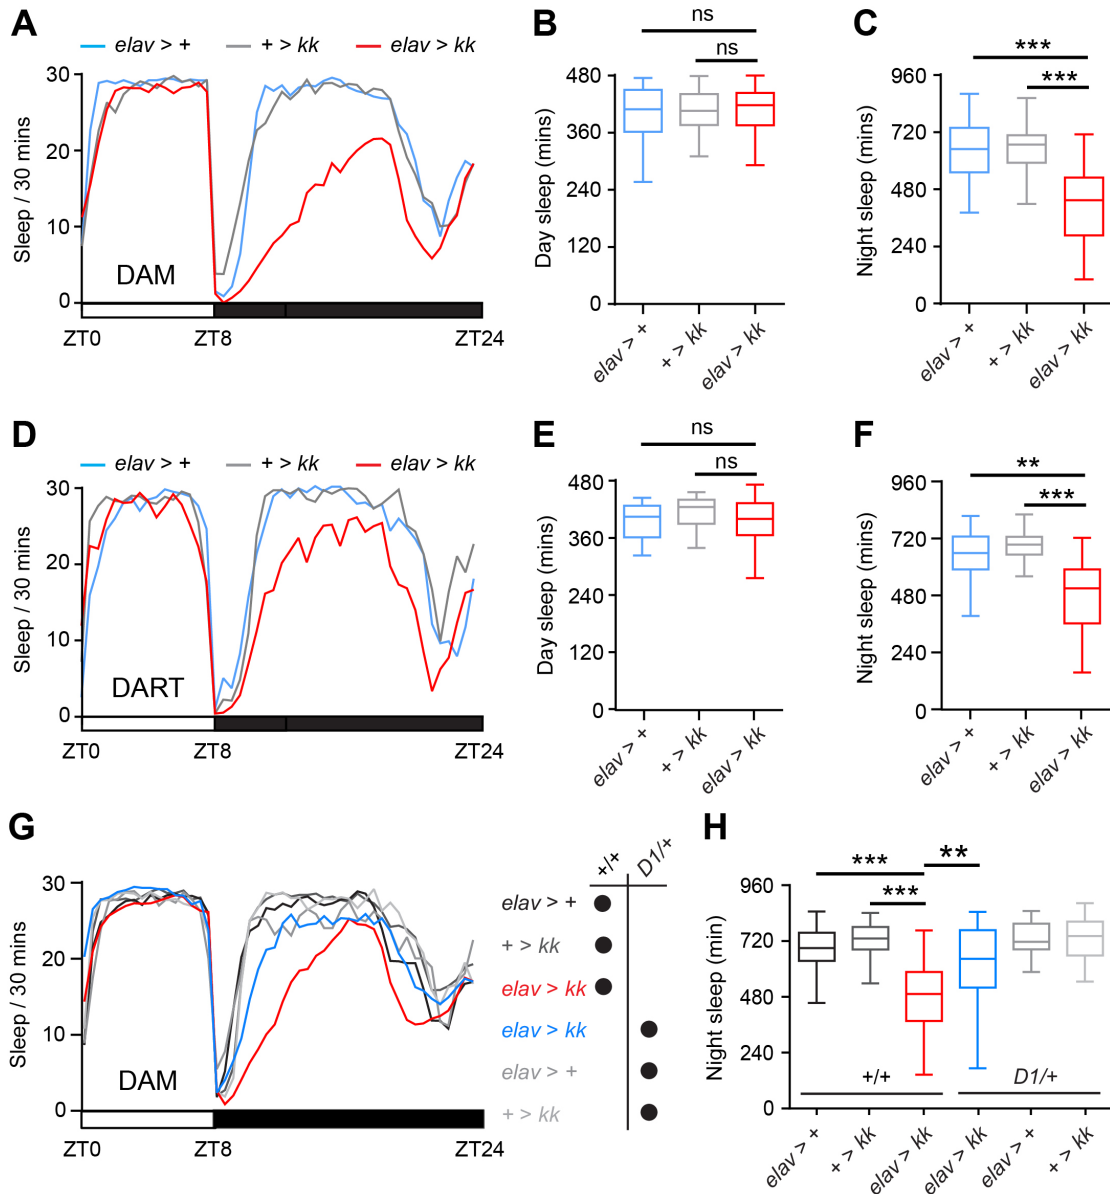

670

671

672 **Figure 2.** *Nca* and *Dop1R1* act in a common pathway to regulate night sleep. (A)

673 Mean sleep levels measured using the DAM system under 8L: 16D conditions for

674 pan-neuronal *Nca* knockdown (*Nca*<sup>KD</sup>) male adult flies (*elav > kk*) and associated

675 controls (*elav*-Gal4 driver or *kk* RNAi transgene heterozygotes). (B-C) Median day

676 and night sleep levels in the above genotypes. n = 54-55. (D) Mean sleep levels

677 measured using DART system in 8L: 16D conditions for above genotypes. (E-F)

678 Median day and night sleep levels in the above genotypes. n = 20 per genotype. (G-H)  
679 heterozygosity for the null or strongly hypomorphic Dop1R1 allele *Dop1R1*<sup>MI03085-</sup>  
680 <sup>GFST.2</sup> (*DI/+*) suppressed sleep loss in *Nca*<sup>KD</sup> adult males, but did not alter sleep in  
681 control males (p > 0.05, between *+/+* and *DI/+* backgrounds for *elav* > + or + > *kk*  
682 flies). Mean sleep patterns in 8L: 16D conditions are shown in (G). Median total night  
683 sleep levels are shown in (H). *elav* > *kk*, *DI/+*: n = 32; *elav* > +, *DI/+*: n = 15; + >  
684 *kk*, *DI/+*: n = 32; *elav* > *kk*: n = 48; *elav* > +: n = 47; + > *kk*: n = 48. \*\*p < 0.01,  
685 \*\*\*p < 0.001, ns – p < 0.05, Kruskal-Wallis test with Dunn’s post-hoc test.  
686  
687

## Figure 2 figure supplement 1

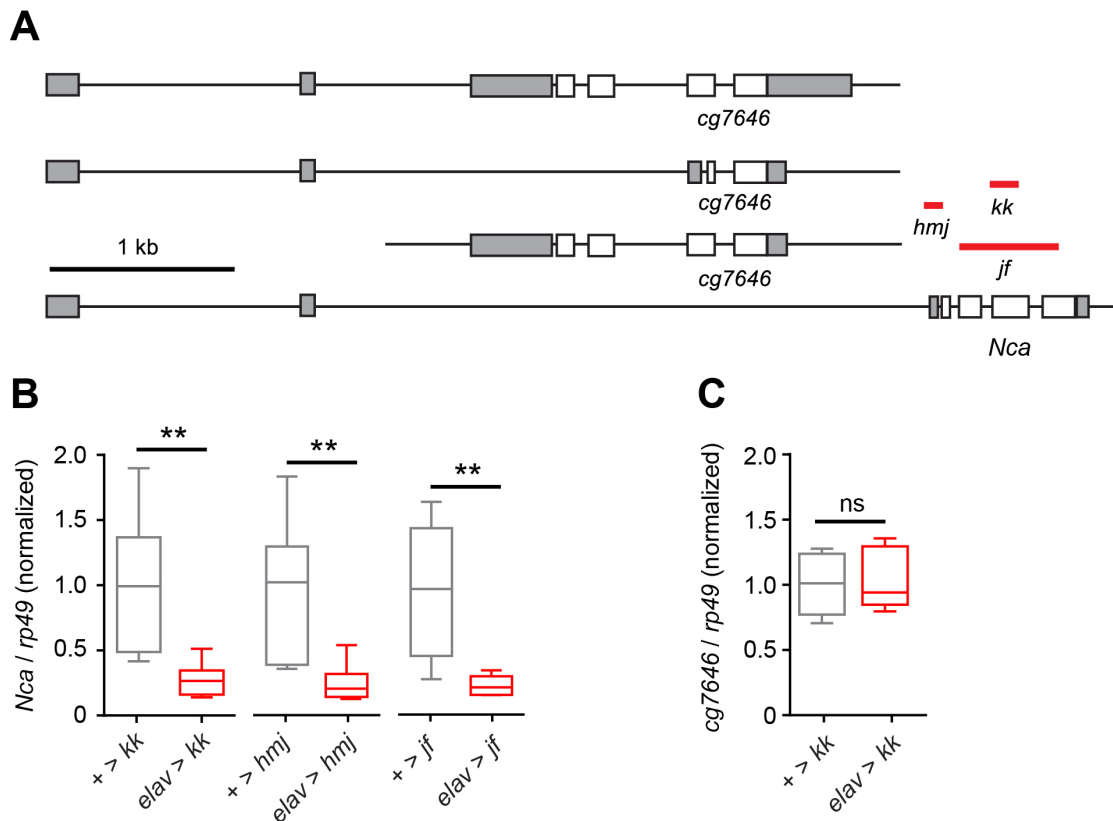

688

689

690 **Figure 2 supplemental figure 1.** Robust knockdown of *Nca* using independent *elav*-

691 Gal4-driven *Nca* RNAi lines. (A) Schematic showing the *Nca* locus alongside the

692 neighbouring *cg7646* locus, which shares a common promoter region with *Nca*.

693 Regions of the *Nca* transcript targeted by the *kk108825*, *hmj21533* and *jf03398* RNAi

694 lines (termed *kk*, *hmj* and *jf* respectively) are depicted by red bars. (B) qPCR

695 verification of *Nca* knockdown by *kk*, *hmj* and *jf*. RNAi. Transgene insertions lacking

696 the *elav*-Gal4 driver were used as controls. (C) Knockdown of *Nca* had no effect on

697 transcription of the neighbouring *cg7646* locus. Expression levels of *Nca* or *cg7646*

698 were normalised to the *rp49* control transcript and are displayed as the ratio to the

699 mean level of the respective RNAi alone controls (*+ > kk*, *+ > hmj* or *+ > jf*). n = 6 for

700 all qPCRs (two independent biological repetitions of RNA extraction with triplicated

701 qPCR reactions for each genotype). \*\* $p < 0.01$ , ns –  $p > 0.05$ , Mann-Whitney U-test.

702



## Figure 2 figure supplement 2

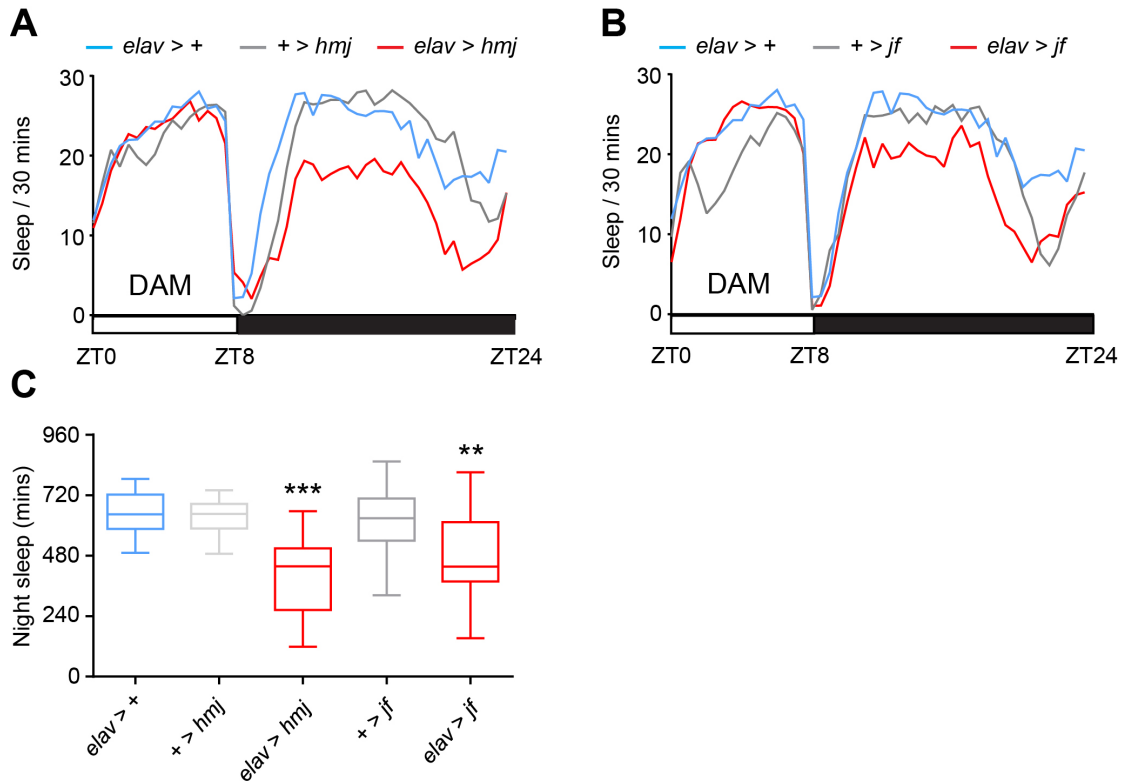

703

704

705 **Figure 2 supplemental figure 2.** Robust night sleep loss in adult male flies

706 expressing two independent *Nca* RNAi lines driven by *elav*-Gal4. (A-B) Mean sleep

707 profiles under 8L:16D conditions for *elav*-gal4 drive, *hmj* (A) or *jf* (B) *Nca* RNAi.

708 (C) Median night sleep amounts for genotypes shown in (A-B). *elav > +*: n = 32; *+ >*

709 *hmj*: n = 26; *elav > hmj*: n = 17; *+ > jf*: n = 32; *elav > jf*: n = 32. \*\*p < 0.01, \*\*\*p <

710 0.001 as compared to driver and RNAi alone controls, Kruskal-Wallis test with

711 Dunn's post-hoc test.

712

### Figure 2 figure supplement 3

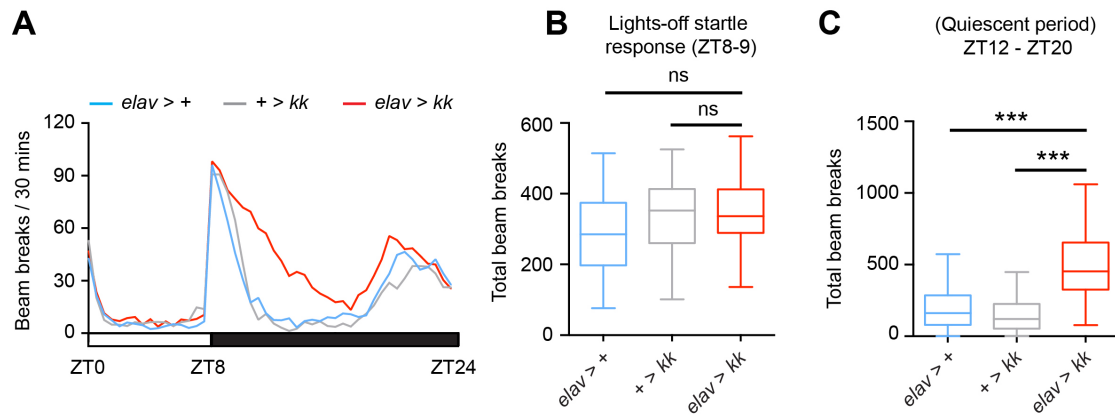

713

714

715 **Figure 2 supplemental figure 3.** Elevated night time locomotor activity in *Nca*<sup>KD</sup>  
716 flies under 8L: 16D conditions, but no alteration in peak locomotor activity. (A) Mean  
717 level of locomotor activity (beam crosses) for *Nca*<sup>KD</sup> males (*elav > kk*) and associated  
718 controls. (B) Median beam breaks during the hour immediately following lights-off  
719 (ZT8-9) in the above genotypes. (C) Median total beam crosses during the normally  
720 quiescent period of the night (ZT12-20) in the above genotypes. n = 54-55 per  
721 genotype. \*\*\*p < 0.001, ns – p > 0.05, Mann-Whitney U-test.

722

723

## Figure 2 figure supplement 4

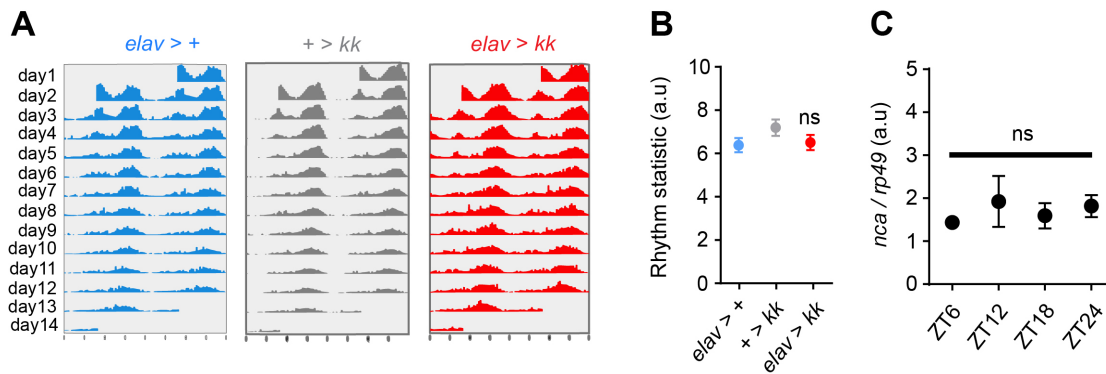

724

725

726 **Figure 2 supplemental figure 4.** *Nca* knockdown does not alter circadian

727 rhythmicity. (A) Actograms showing representative individual patterns of locomotor

728 activity across two weeks under constant dark conditions. (B) Quantification of

729 locomotor rhythm strength. Robust circadian patterns of locomotor activity were still

730 observed following in adult males expressing *Nca* RNAi (*kk*) under *elav*-Gal4 relative

731 to controls.  $15 > n > 14$ . (C) qPCR analysis of wild type (*Canton-S*) head *Nca*

732 expression across a 24 h period. No evidence of circadian oscillations in *Nca*

733 expression was observed.  $n = 3$  (triplicated qPCR reactions for each time point).

734 Expression levels were normalised to the *rp49* control transcript. ns –  $p > 0.05$ ,

735 Kruskal-Wallis test with Dunn's post-hoc test.

736

737

## Figure 2 figure supplement 5

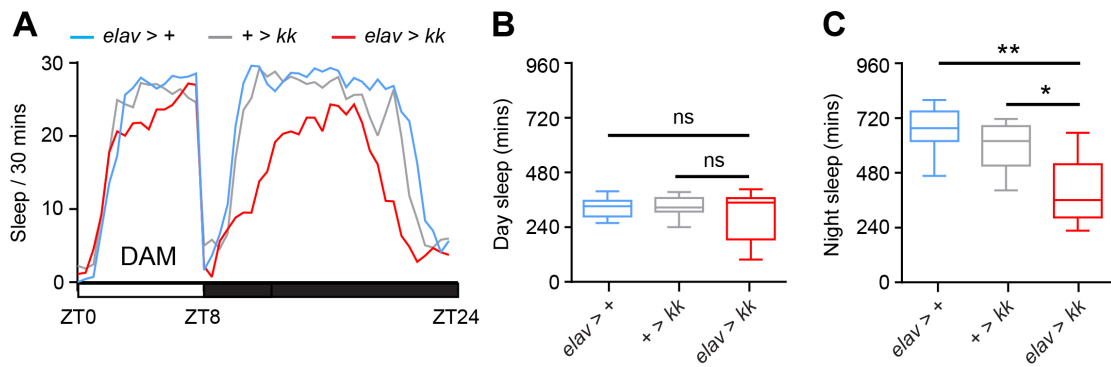

738

739

740 **Figure 2 supplemental figure 5.** Neuronal *Nca* knockdown results in reduced night  
741 sleep in adult virgin female *Drosophila*. (A) Mean sleep patterns of neuronal *Nca*  
742 knockdown females (*elav > kk*) and associated controls under 8L:16D conditions. (B-  
743 C) Median day sleep is unaffected relative to controls (B), whereas median night  
744 sleep is significantly reduced (C). n = 16 per genotype. \*p < 0.05, \*\*p < 0.01,  
745 Kruskal-Wallis test with Dunn's post-hoc test.

746

747

## Figure 2 figure supplement 6

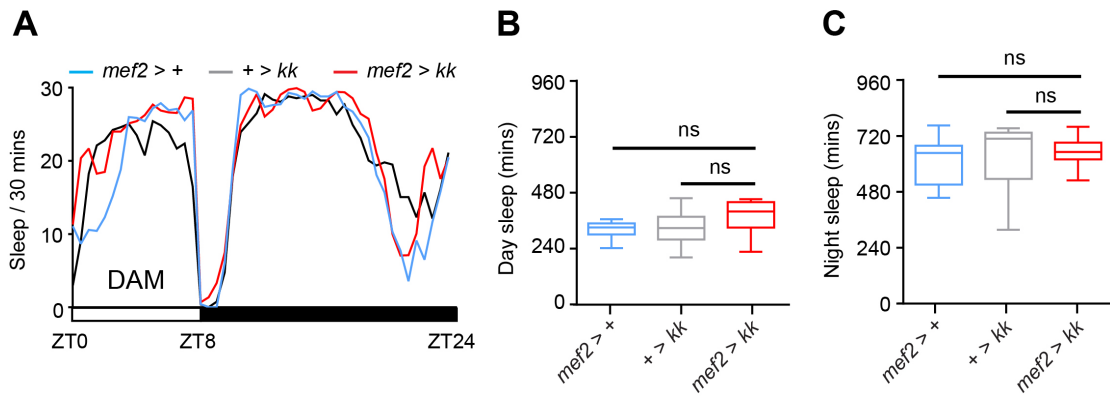

748

749

750 **Figure 2 supplemental figure 6.** *Nca* knockdown in muscle cells does not affect  
751 sleep in *Drosophila*. (A) Mean sleep patterns of adult male flies with muscle-specific  
752 *Nca* knockdown via *mef2*-Gal4 (*mef2 > kk*) and associated controls under 8L: 16D.  
753 (B-C) Median day (B) and night (C) sleep levels are unaffected relative to controls. n  
754 = 16 per genotype. ns – p > 0.05, Kruskal-Wallis test with Dunn's post-hoc test.

755

756

## Figure 2 figure supplement 7

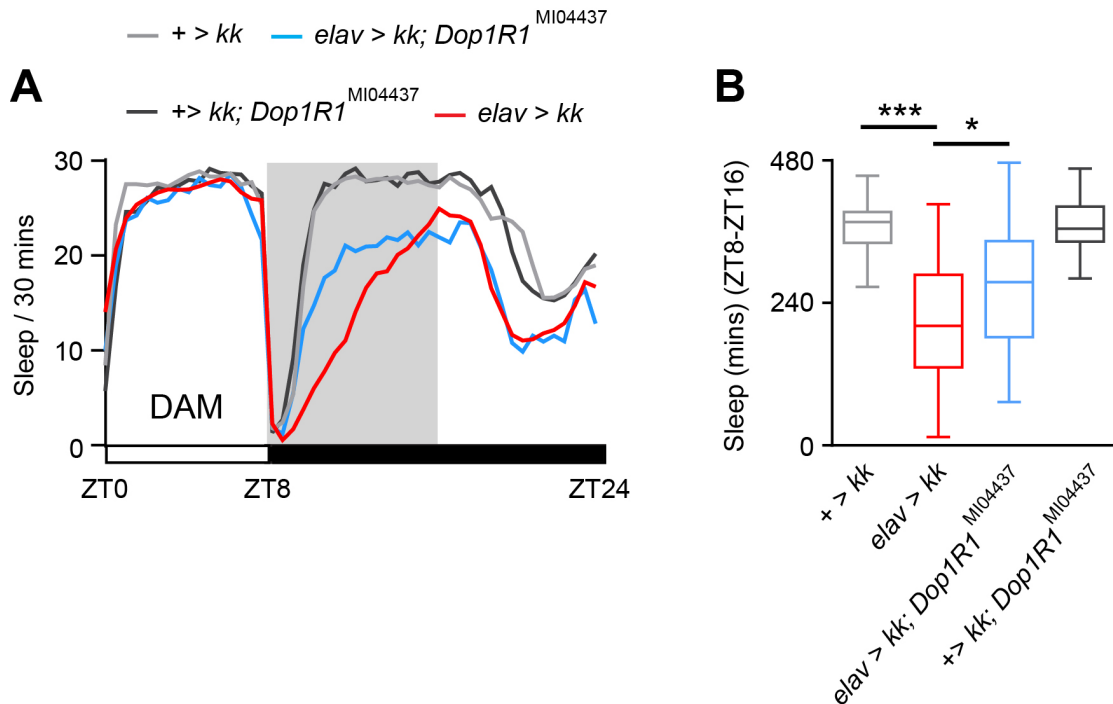

757

758 **Figure 2 supplemental figure 7.** Genetic interaction between *Nca* and a second  
 759 independent *Dop1R1* allele. (A) Mean sleep patterns of *Nca*<sup>KD</sup> males (*elav* > *kk*) and a  
 760 heterozygous *kk* alone control with and without one copy of the *Dop1R1*<sup>MI04437</sup> allele  
 761 under 8L: 16D conditions. *Dop1R1*<sup>MI04437</sup> is a hypomorphic allele of *Dop1R1* that is  
 762 homozygous viable, and is therefore weaker compared to the homozygous lethal  
 763 *Dop1R1*<sup>MI03085-GFST.2</sup> insertion. (B) Median night sleep levels during ZT8-16 are  
 764 shown. Heterozygosity for *Dop1R1*<sup>MI04437</sup> had no impact on sleep in *kk* heterozygote  
 765 controls but partially rescued night sleep during ZT8-16 in *Nca*<sup>KD</sup> males. *elav* > *kk*: n  
 766 = 64; + > *kk*: n = 64; *elav* > *kk*; *Dop1R1*<sup>MI04437/+</sup>: n = 39; + > *kk*; *Dop1R1*<sup>MI04437/+</sup>: n =  
 767 45. \*p < 0.05, \*\*\*p < 0.001, Kruskal-Wallis test with Dunn's post-hoc test.

768

769

## Figure 2 figure supplement 8

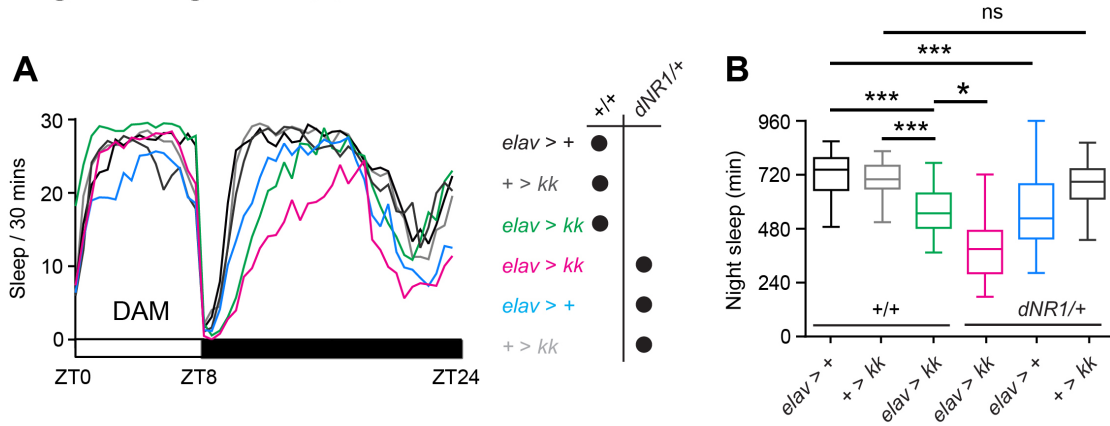

770

771

772 **Figure 2 supplemental figure 8.** NCA regulate sleeps in a distinct pathway to the  
773 dNR1 NMDA receptor. (A) Mean sleep patterns of *Nca*<sup>KD</sup> males (*elav > kk*) and  
774 heterozygous controls with and without one copy of the *dNR1*<sup>M11796</sup> (*dNR1/+*) allele  
775 in 8L: 16D conditions are shown. (B) Median night sleep levels in the above  
776 genotypes. Heterozygosity for *dNR1*<sup>M11796</sup> resulted in sleep loss in *elav*-Gal4 driver  
777 controls, and reduced sleep further in an additive manner in *elav > kk Nca*<sup>KD</sup> males,  
778 suggesting that NCA and dNR1 act in separate pathways to promote night sleep. *Elav*  
779 *> kk; dNR1/+*: n = 32; *elav > +; dNR1/+*: n = 26; *+ > kk; dNR1/+*: n = 38; *elav > kk*:  
780 n = 32; *elav > +*: n = 30; *+ > kk*: n = 34. ns – p > 0.05, \*p < 0.05, \*\*p < 0.01, \*\*\*p <  
781 0.001, Kruskal-Wallis test with Dunn's post-hoc test.

782

783

### Figure 3

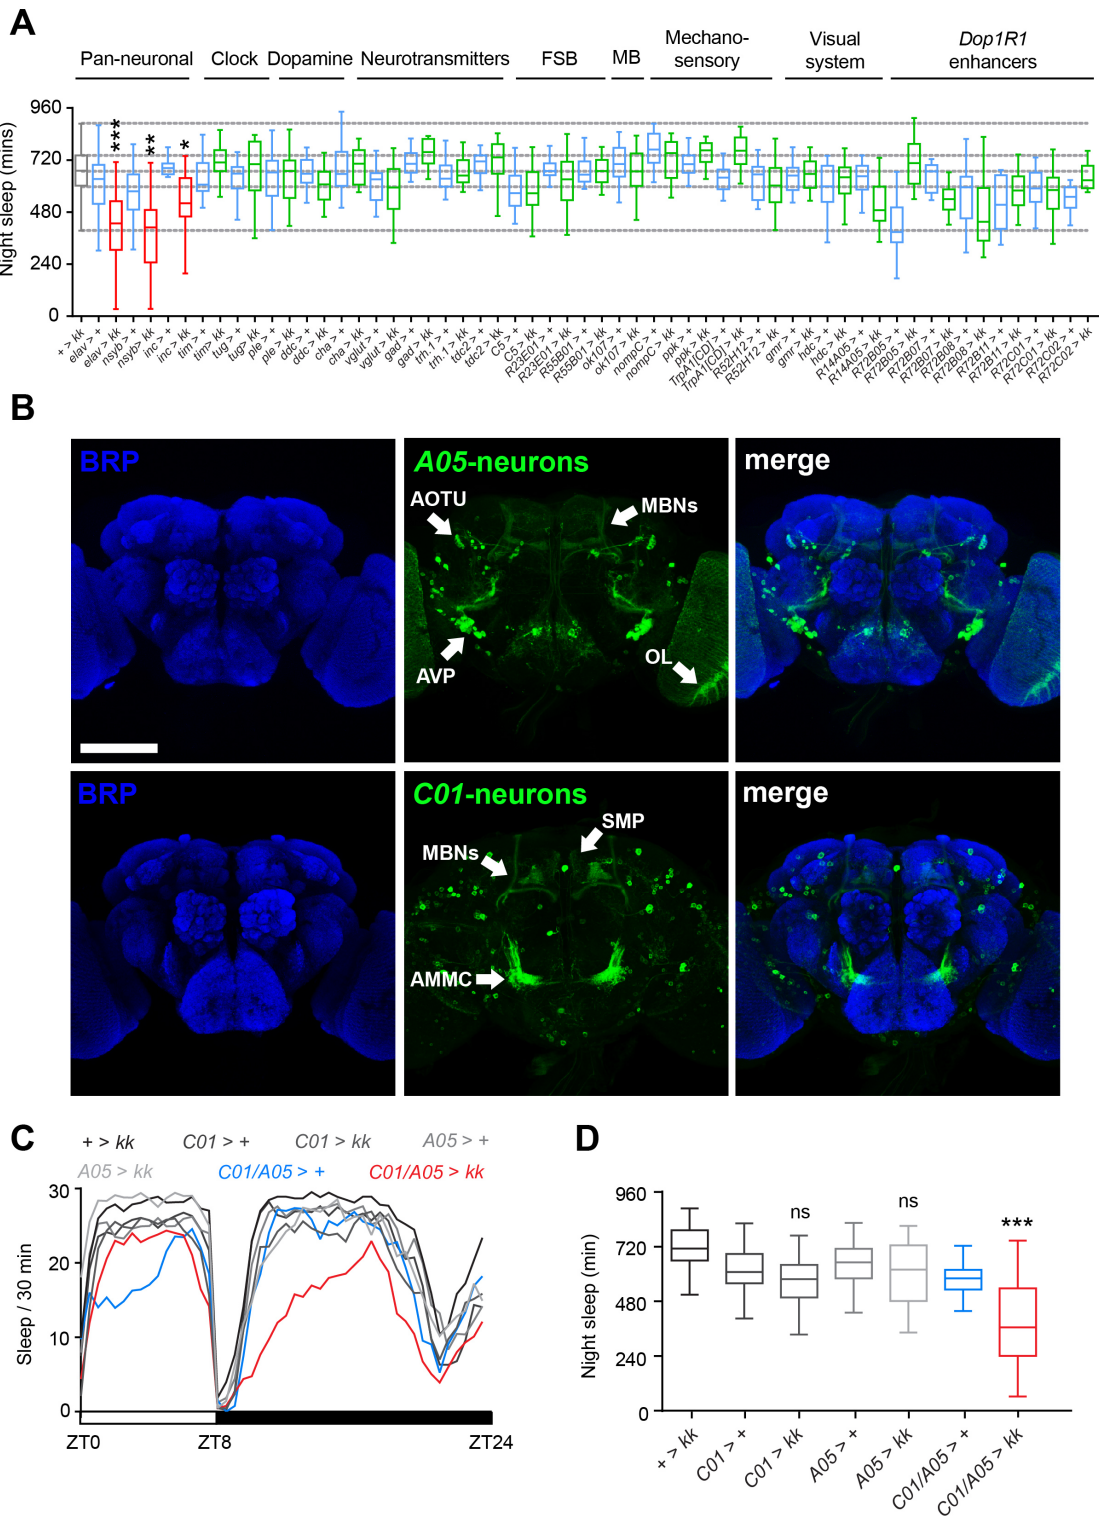

784

785

786 **Figure 3.** NCA acts in a two distinct neural networks to regulate night sleep. (A)

787 Transgenic RNAi-based mini-screen to identify key NCA-expressing neurons. NCA



788 knockdown with broadly expressed drivers resulted in reduced night sleep in adult  
789 males under 8L: 16D conditions. In contrast, NCA knockdown in previously defined  
790 sleep-regulatory centers, clock neurons, the visual system or subsets of Dop1R1-  
791 expressing neurons did not impact night sleep. FSB: fan-shaped body. MB:  
792 mushroom body. Grey and blue box plots: control lines. Red box plots: experimental  
793 lines showing reduced night sleep relative to controls. Green box plots: experimental  
794 lines failing to show reduced night sleep relative to one or both controls. See Figure 3  
795 figure supplement 1 for n-values and statistical comparisons. (B) Confocal z-stacks of  
796 adult male brains expressing genetically-encoded fluorophores under the *A05* or *C01*-  
797 Gal4 drivers. Neuropil regions are labelled with anti-Bruchpilot (BRP). Scale bar =  
798 100  $\mu$ m. Arrows point to neuropil centers. AOTU: anterior optic tubercle. MBNs:  
799 mushroom body neurons. OL: optic lobe. AMMC: antennal mechanosensory and  
800 motor center. AVP: anterior ventrallateral protocerebrum. SMP: supra-medial  
801 protocerebrum. (C-D) *Nca* knockdown in both *A05* and *C01*-neurons recapitulates the  
802 effect of pan-neuronal *Nca* knockdown, whereas *Nca* knockdown in either neuronal  
803 subpopulation alone did not reduce sleep relative to controls. Mean sleep patterns in  
804 8L: 16D conditions are shown in (C). Median night sleep levels are shown in (D). + >  
805 *kk*: n = 80; *C01* > +: n = 64, *C01* > *kk*: n = 80; *A05* > +: n = 31; *A05* > *kk*: n = 31;  
806 *C01/A05* > +: n = 42; *C01/A05* > *kk*: n = 71. \*p < 0.05, \*\*p < 0.01, \*\*\*p < 0.001, ns  
807 – p > 0.05 compared to driver and RNAi alone controls, Kruskal-Wallis test with  
808 Dunn's post-hoc test.  
809

**Figure 3 figure supplement 1.** Night sleep levels in flies with *kk Nca RNAi* driven by neuron sub-type-specific Gal4 drivers.

| Genotype  | n-values | 25% Percentile | Median | 75% Percentile | Mean  | Std. Deviation | Dunn's test |            |
|-----------|----------|----------------|--------|----------------|-------|----------------|-------------|------------|
|           |          | (min)          | (min)  | (min)          | (min) | (min)          | vs +>kk     | vs Gal4 >+ |
| +>kk      | 275      | 602            | 671    | 742            | 668   | 110            | -           | -          |
| elav>+    | 86       | 518            | 633    | 698            | 604   | 133            | -           | -          |
| elav>kk   | 99       | 306            | 428    | 530            | 413   | 168            | ***         | ***        |
| nsyb>+    | 40       | 491            | 576    | 654            | 565   | 121            | -           | -          |
| nsyb>kk   | 39       | 248            | 409    | 490            | 388   | 196            | ***         | *          |
| inc>+     | 14       | 655            | 684    | 705            | 688   | 56             | -           | -          |
| inc>kk    | 30       | 460            | 521    | 637            | 534   | 128            | ***         | **         |
| tim>+     | 16       | 577            | 607    | 707            | 636   | 91             | -           | -          |
| tim>kk    | 16       | 668            | 709    | 767            | 707   | 80             | ns          | ns         |
| tug>+     | 16       | 590            | 658    | 688            | 650   | 117            | -           | -          |
| tug>kk    | 15       | 580            | 701    | 805            | 670   | 134            | ns          | ns         |
| ple>+     | 32       | 556            | 663    | 718            | 634   | 132            | -           | -          |
| ple>kk    | 30       | 545            | 670    | 718            | 642   | 101            | ns          | ns         |
| Ddc>+     | 16       | 616            | 658    | 721            | 662   | 63             | -           | -          |
| Ddc>kk    | 16       | 538            | 608    | 667            | 610   | 84             | ns          | ns         |
| Chat>+    | 16       | 601            | 656    | 758            | 677   | 111            | -           | -          |
| Chat>kk   | 14       | 607            | 704    | 766            | 672   | 140            | ns          | ns         |
| vGlut>+   | 16       | 536            | 632    | 660            | 607   | 91             | -           | -          |
| vGlut>kk  | 24       | 495            | 594    | 679            | 586   | 111            | ns          | ns         |
| GAD>+     | 16       | 662            | 703    | 752            | 689   | 82             | -           | -          |
| GAD>kk    | 16       | 705            | 758    | 817            | 739   | 100            | ns          | ns         |
| Trh.1>+   | 16       | 598            | 635    | 696            | 640   | 83             | -           | -          |
| Trh.1>kk  | 16       | 617            | 649    | 720            | 668   | 71             | ns          | ns         |
| Tdc2>+    | 16       | 659            | 715    | 742            | 682   | 105            | -           | -          |
| Tdc2>kk   | 15       | 657            | 733    | 794            | 695   | 128            | ns          | ns         |
| C5>+      | 40       | 509            | 568    | 648            | 583   | 103            | -           | -          |
| C5>kk     | 49       | 513            | 567    | 665            | 581   | 107            | ***         | ns         |
| R23E10>+  | 16       | 651            | 670    | 705            | 680   | 48             | -           | -          |
| R23E10>kk | 16       | 535            | 632    | 712            | 621   | 122            | ns          | ns         |
| R55B01>+  | 16       | 621            | 653    | 714            | 652   | 107            | -           | -          |
| R55B01>kk | 16       | 618            | 670    | 721            | 680   | 80             | ns          | ns         |
| OK107>+   | 23       | 644            | 702    | 777            | 695   | 94             | -           | -          |

|           |    |     |     |     |     |     |     |     |
|-----------|----|-----|-----|-----|-----|-----|-----|-----|
| OK107>kk  | 32 | 601 | 668 | 751 | 664 | 106 | ns  | ns  |
| nompC>+   | 16 | 708 | 769 | 842 | 768 | 76  | -   | -   |
| nompC>kk  | 16 | 638 | 753 | 804 | 725 | 92  | ns  | ns  |
| ppk>+     | 16 | 661 | 701 | 742 | 706 | 62  | -   | -   |
| ppk>kk    | 16 | 712 | 766 | 798 | 760 | 78  | ns  | ns  |
| trpACD>+  | 16 | 586 | 639 | 677 | 630 | 62  | -   | -   |
| trpACD>kk | 15 | 702 | 764 | 825 | 758 | 75  | ns  | *   |
| R52H12>+  | 16 | 536 | 654 | 689 | 629 | 92  | -   | -   |
| R52H12>kk | 32 | 525 | 603 | 684 | 581 | 155 | ns  | ns  |
| GMR>+     | 16 | 582 | 649 | 685 | 640 | 73  | -   | -   |
| GMR>kk    | 14 | 592 | 656 | 714 | 652 | 79  | ns  | ns  |
| Hdc>+     | 16 | 527 | 599 | 694 | 575 | 145 | -   | -   |
| Hdc>kk    | 16 | 566 | 641 | 686 | 624 | 86  | ns  | ns  |
| R21G01>+  | 15 | 584 | 646 | 694 | 631 | 75  | -   | -   |
| R21G01>kk | 16 | 440 | 489 | 598 | 519 | 109 | **  | ns  |
| R72B05>+  | 15 | 341 | 388 | 502 | 397 | 146 | -   | -   |
| R72B05>kk | 16 | 611 | 706 | 795 | 710 | 107 | ns  | *** |
| R72B07>+  | 13 | 570 | 668 | 697 | 645 | 66  | -   | -   |
| R72B07>kk | 14 | 492 | 541 | 585 | 545 | 69  | **  | ns  |
| R72B08>+  | 16 | 452 | 595 | 643 | 561 | 129 | -   | -   |
| R72B08>kk | 32 | 348 | 436 | 591 | 474 | 159 | *** | ns  |
| R72B11>+  | 16 | 403 | 515 | 651 | 513 | 123 | -   | -   |
| R72B11>kk | 15 | 512 | 580 | 645 | 583 | 88  | ns  | ns  |
| R72C01>+  | 48 | 528 | 590 | 662 | 591 | 84  | -   | -   |
| R72C01>kk | 64 | 496 | 582 | 639 | 569 | 104 | *** | ns  |
| R72C02>+  | 16 | 500 | 551 | 595 | 544 | 62  | -   | -   |
| R72C02>kk | 16 | 591 | 627 | 694 | 643 | 60  | ns  | ns  |

- Not significant, ns- $p > 0.05$ , \* $p < 0.05$ , \*\* $p < 0.01$ , \*\*\* $p < 0.001$ , Kruskal-Wallis test with Dunn's post-hoc test.

### Figure 3 figure supplement 2

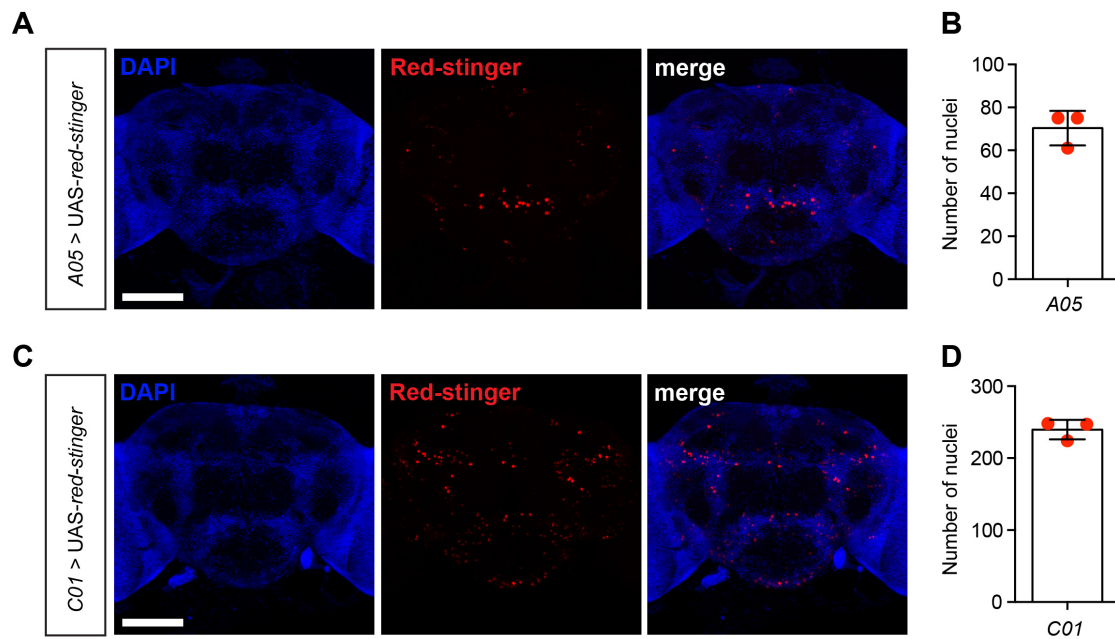

817

818

819 **Figure 3 supplemental figure 2.** *C01*-Gal4 and *A05*-Gal4 label small subsets of

820 neurons in the adult fly brain. (A, C) Representative confocal z-stacks of adult male

821 brains expressing nuclear RFP marker (Red-stinger) under *A05*-Gal4 (A) or *C01*-Gal4

822 driver (C). DAPI-staining labels nuclei within the *Drosophila* brain. (B, D) Number

823 of cells expressing Red-stinger driven by *A05*- (B) or *C01*-Gal4 (D). n = 3 for each

824 genotype. Scale bar =100  $\mu$ m.

825

826

### Figure 3 figure supplement 3

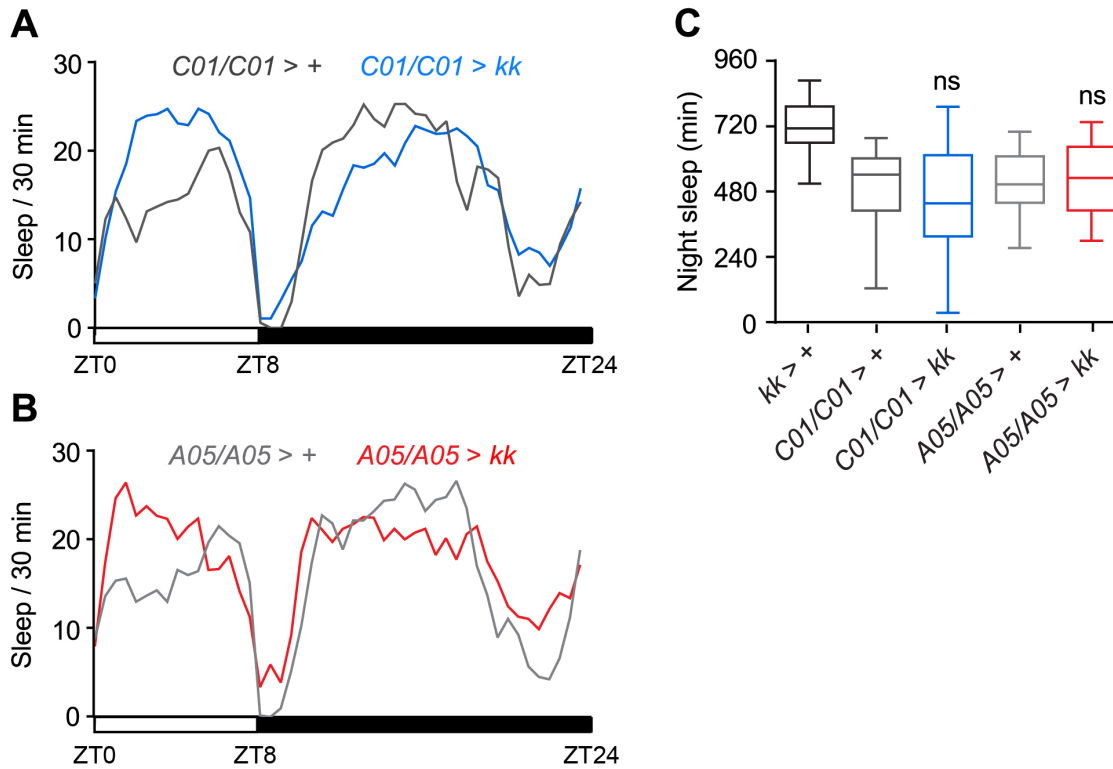

827

828

829 **Figure 3 supplemental figure 3.** (A) Mean sleep patterns of adult males homozygous

830 for the *C01*-Gal4 driver with and without the *kk Nca* RNAi insertion. (B) Mean sleep

831 patterns of adult males homozygous for the *A05*-Gal4 driver with and without the *kk*

832 *Nca* RNAi insertion. (C) Median night sleep levels for heterozygous RNAi transgene

833 and homozygous driver controls, and males expressing *Nca* RNAi with two Gal4

834 driver copies. No night sleep loss was observed using two copies of either driver

835 relative to controls. + > *kk*: n = 80 (the same population was used in Figure 3C, as the

836 experiments were performed side by side), *C01/C01* > +: n = 24, *C01/C01* > *kk*: n =

837 39; *A05/A05* > : n = 22, *A05/A05* > *kk*: n = 23. ns – p > 0.05, Kruskal-Wallis test with

838 Dunn's post-hoc test.

839

## Figure 3 figure supplement 4

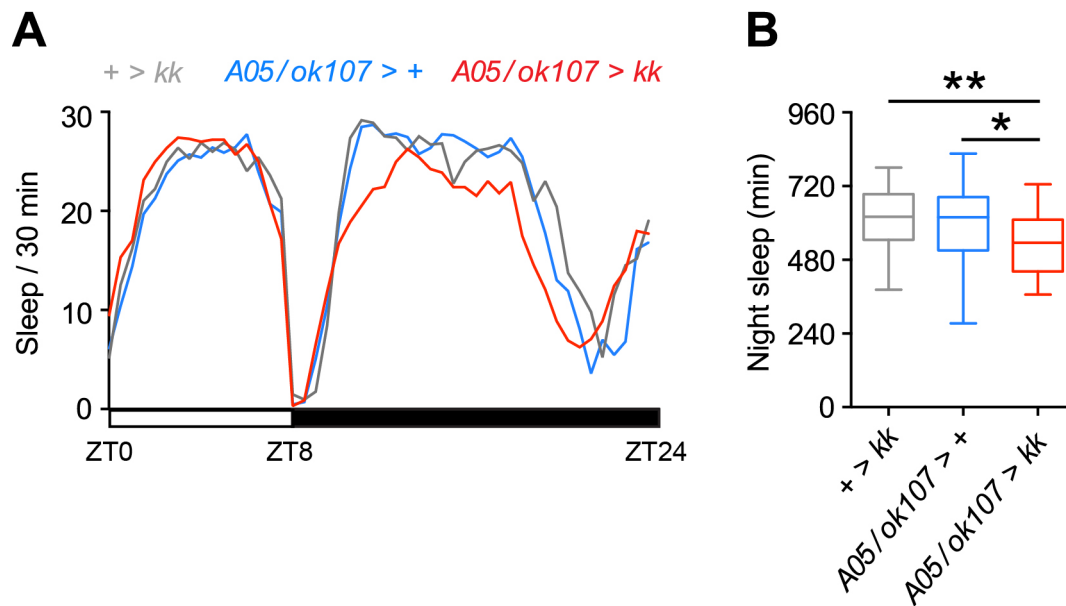

840

841

842 **Figure 3 supplemental figure 4.** Knockdown of *Nca* in mushroom body and *A05*-

843 neurons results in partial night sleep loss. (A-B) *Nca* knockdown in both *A05* and

844 MB-neurons (defined by *ok107*-Gal4; *ok107*) results in reduced night sleep (also see

845 Figure 3A showing *ok107 > kk* alone does not cause night sleep loss). Mean sleep

846 patterns in 8L: 16D conditions are shown in (A). Median night sleep levels are shown

847 in (B). *+ > kk*: n = 31; *A05/ok107 > +*: n = 33; *A05/ok107 > kk*: n = 42. \*p < 0.05, \*\*p

848 < 0.01, Kruskal-Wallis test with Dunn's post-hoc test.

849

850

## Figure 4

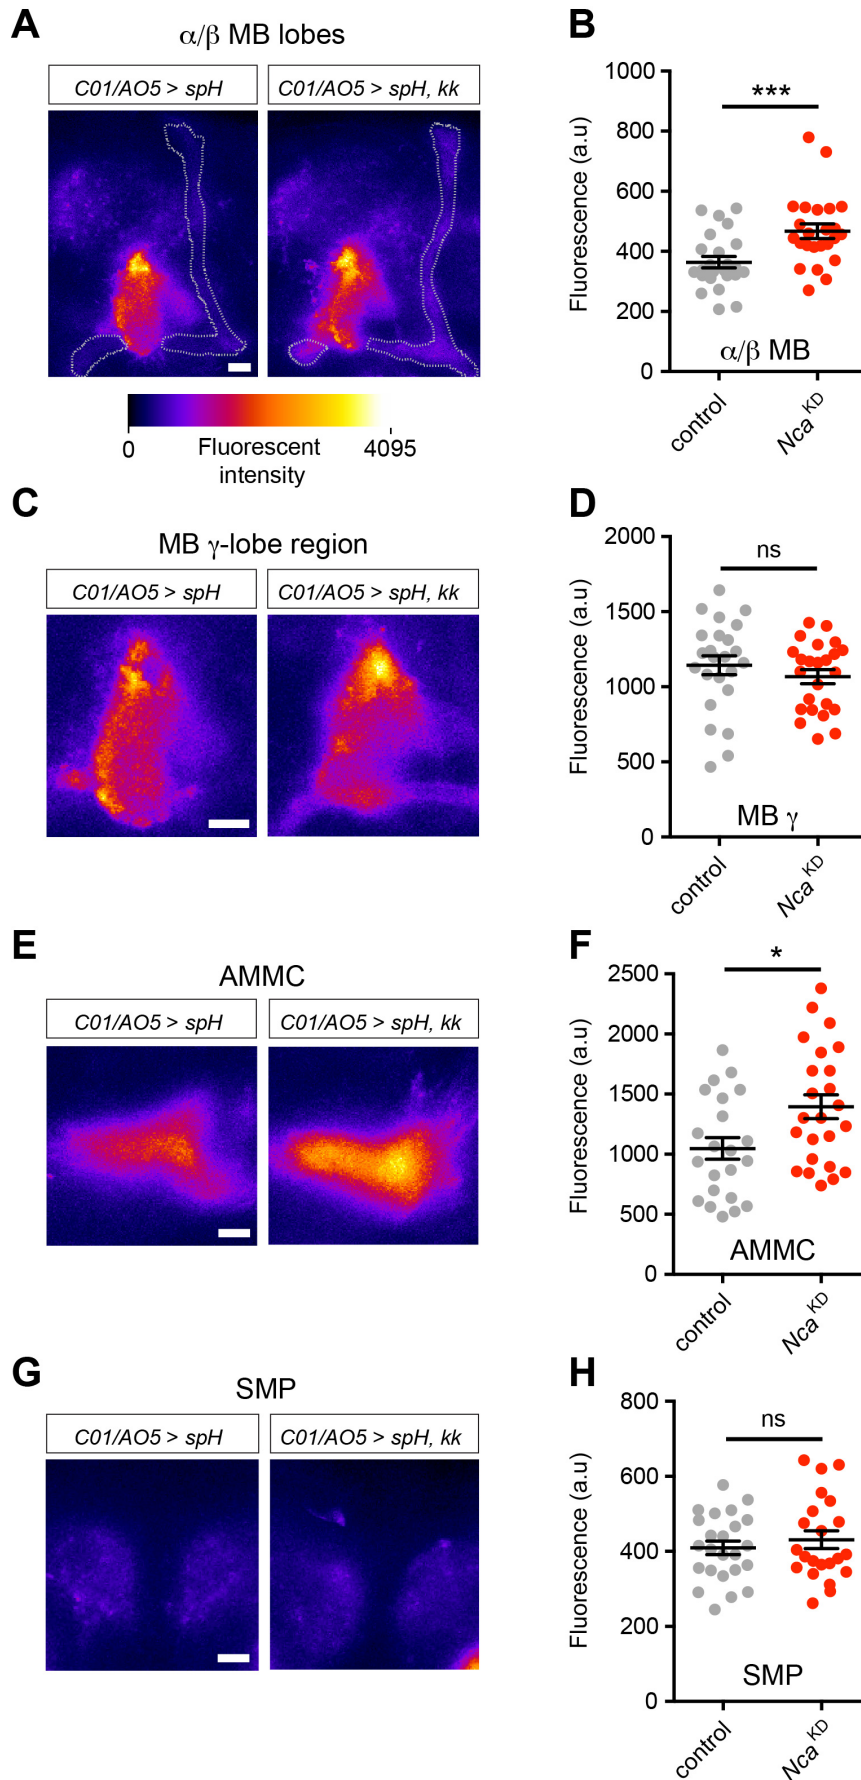

852 **Figure 4.** NCA inhibits synaptic release in subsets of *C01/A05* neurons. Expression of  
853 a fluorescent marker for synaptic release (synapto-pHluorin, spH) in *C01*- and *A05*-  
854 positive neurons in control (*C01/A05* > *spH*) or *Nca* knockdown (*C01/A05* > *spH, kk*)  
855 backgrounds. Adult brains were dissected and imaged between ZT9-ZT11, when  
856 robust sleep loss occurs in *C01/A05* > *kk* flies (see Figure 3C). (A, C, E, G)  
857 Representative pseudo-coloured images for  $\alpha/\beta$  mushroom body lobe Kenyon cells  
858 ( $\alpha/\beta$  MB, A;  $\alpha/\beta$  lobes are outlined in white), the MB  $\gamma$ -lobe region (C), AMMC (E)  
859 and SMP (G) regions in each genotype. Fluorescent intensity range is shown in the  
860 horizontal bar, illustrating minimum to maximum spectrum. Scale bars = 10  $\mu\text{m}$ . (B,  
861 D, F, H) Mean fluorescent intensity for individual hemispheres in the above regions. n  
862 = 22-24. \* $p < 0.05$ , \*\*\* $p < 0.001$ , Mann-Whitney U-test.

863

864



## Figure 5

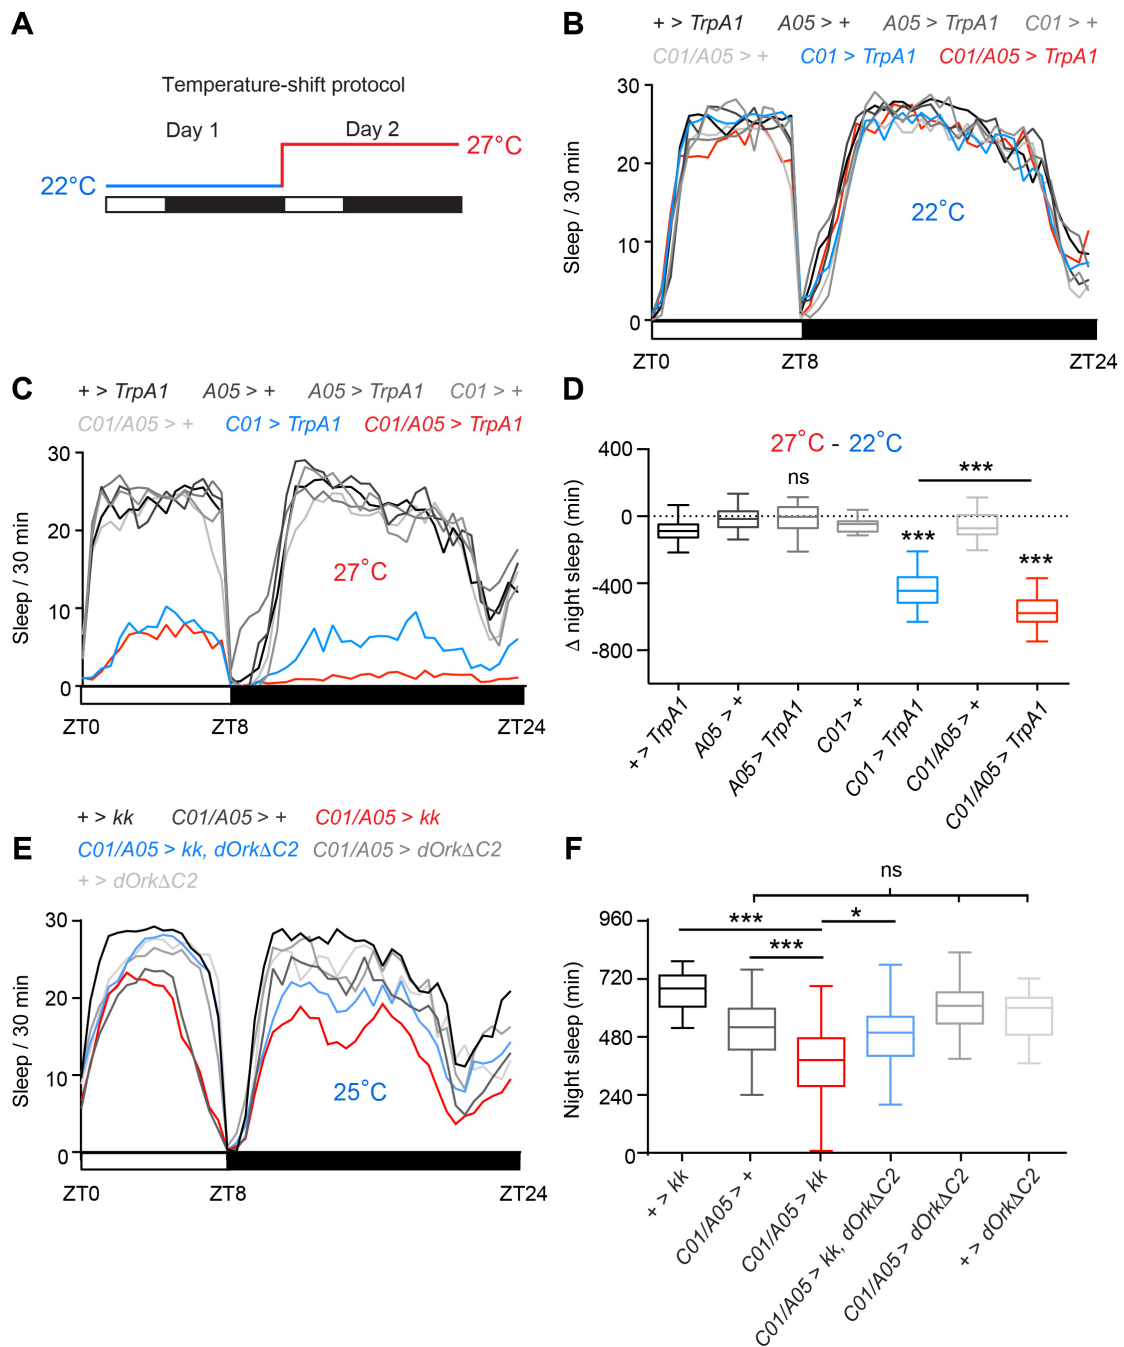

865

866

867 **Figure 5.** Sleep loss in *Nca* knockdown flies is caused by enhanced excitability of  
 868 *C01/A05* neurons. (A) Experimental paradigm for acute activation of *A05* or *C01*-  
 869 neurons. 22°C: non-activating temperature for *TrpA1*. 27°C: activating temperature.  
 870 Sleep measurements were measured over two days in 8L: 16D conditions. (B-C)  
 871 Mean sleep levels across 8L: 16D following expression of *TrpA1* in *A05*-, *C01*- or

872 *A05*- and *C01*-neurons (and associated controls) at 22°C (B) or 27°C (C). (D) Median  
873 change in night sleep levels ( $\Delta$  night sleep) following the shift from 22°C on day 1 to  
874 27°C on day 2. +> *TrpA1*: n = 53; *A05* > +: n = 23; *A05* > *TrpA1*: n = 68; *C01* > +: n  
875 = 24; *C01* > *TrpA1*: n = 40; *C01/A05* > +: n = 33; *C01/A05* > *TrpA1*: n = 40. \*\*\*p <  
876 0.001, ns – p > 0.05, as compared to *TrpA1* or driver alone controls by Kruskal-Wallis  
877 test with Dunn’s post-hoc test (for *C01*, *A05* or *C01/A05* > *TrpA1* compared to  
878 controls) or Mann-Whitney U-test (for *C01/A05* > *TrpA1* compared to *C01* > *TrpA1*).  
879 (E-F) Inhibition of *C01/A05* neurons by expressing dORK $\Delta$ C2 rescues sleep loss due  
880 to *Nca* knockdown in *C01/A05* neurons, while expression of dORK $\Delta$ C2 does not  
881 change base line sleep. Mean sleep patterns in 8L: 16D conditions are shown in (E).  
882 Median night sleep levels are shown in (F). +> *kk*: n = 47, *C01/A05* > +: n = 47,  
883 *C01/A05* > *kk*: n = 62, *C01/A05* > dORK $\Delta$ C2, *kk*: n = 50, *C01/A05* > dORK $\Delta$ C2: n =  
884 39, +> dORK $\Delta$ C2: n = 30. \*p < 0.05, \*\*\*p < 0.001, ns – p > 0.05, Kruskal-Wallis  
885 test with Dunn’s post-hoc test.  
886  
887  
888  
889  
890  
891  
892  
893  
894  
895

896 **References**

- 897 Afonso, D.J., Liu, D., Machado, D.R., Pan, H., Jepson, J.E., Rogulja, D., and Koh, K.  
898 (2015). TARANIS Functions with Cyclin A and Cdk1 in a Novel Arousal Center to  
899 Control Sleep in *Drosophila*. *Curr Biol* 25, 1717-1726.
- 900 Andrade, R., Foehring, R.C., and Tzingounis, A.V. (2012). The calcium-activated  
901 slow AHP: cutting through the Gordian knot. *Front Cell Neurosci* 6, 47.
- 902 Baena-Lopez, L.A., Alexandre, C., Mitchell, A., Pasakarnis, L., and Vincent, J.P.  
903 (2013). Accelerated homologous recombination and subsequent genome modification  
904 in *Drosophila*. *Development* 140, 4818-4825.
- 905 Braunewell, K.H., and Klein-Szanto, A.J. (2009). Visinin-like proteins (VSNLs):  
906 interaction partners and emerging functions in signal transduction of a subfamily of  
907 neuronal Ca<sup>2+</sup> -sensor proteins. *Cell Tissue Res* 335, 301-316.
- 908 Breakefield, X.O., Blood, A.J., Li, Y., Hallett, M., Hanson, P.I., and Standaert, D.G.  
909 (2008). The pathophysiological basis of dystonias. *Nat Rev Neurosci* 9, 222-234.
- 910 Burgoyne, R.D., and Haynes, L.P. (2012). Understanding the physiological roles of  
911 the neuronal calcium sensor proteins. *Mol Brain* 5, 2.
- 912 Calabresi, P., Pisani, A., Rothwell, J., Ghiglieri, V., Obeso, J.A., and Picconi, B.  
913 (2016). Hyperkinetic disorders and loss of synaptic downscaling. *Nat Neurosci* 19,  
914 868-875.
- 915 Charlesworth, G., Angelova, P.R., Bartolome-Robledo, F., Ryten, M., Trabzuni, D.,  
916 Stamelou, M., Abramov, A.Y., Bhatia, K.P., and Wood, N.W. (2015). Mutations in  
917 HPCA cause autosomal-recessive primary isolated dystonia. *Am J Hum Genet* 96,  
918 657-665.
- 919 Charlesworth, G., Plagnol, V., Holmstrom, K.M., Bras, J., Sheerin, U.M., Preza, E.,  
920 Rubio-Agusti, I., Ryten, M., Schneider, S.A., Stamelou, M., *et al.* (2012). Mutations

921 in ANO3 cause dominant craniocervical dystonia: ion channel implicated in  
922 pathogenesis. *Am J Hum Genet* 91, 1041-1050.

923 Donlea, J.M., Thimgan, M.S., Suzuki, Y., Gottschalk, L., and Shaw, P.J. (2011).  
924 Inducing sleep by remote control facilitates memory consolidation in *Drosophila*.  
925 *Science* 332, 1571-1576.

926 Fahn, S. (1988). Concept and classification of dystonia. *Adv Neurol* 50, 1-8.

927 Faville, R., Kottler, B., Goodhill, G.J., Shaw, P.J., and van Swinderen, B. (2015).  
928 How deeply does your mutant sleep? Probing arousal to better understand sleep  
929 defects in *Drosophila*. *Sci Rep* 5, 8454.

930 Fuchs, T., Gavarini, S., Saunders-Pullman, R., Raymond, D., Ehrlich, M.E.,  
931 Bressman, S.B., and Ozelius, L.J. (2009). Mutations in the THAP1 gene are  
932 responsible for DYT6 primary torsion dystonia. *Nat Genet* 41, 286-288.

933 Fuchs, T., Saunders-Pullman, R., Masuho, I., Luciano, M.S., Raymond, D., Factor, S.,  
934 Lang, A.E., Liang, T.W., Trosch, R.M., White, S., *et al.* (2013). Mutations in GNAL  
935 cause primary torsion dystonia. *Nat Genet* 45, 88-92.

936 Gerfen, C.R., and Surmeier, D.J. (2011). Modulation of striatal projection systems by  
937 dopamine. *Annu Rev Neurosci* 34, 441-466.

938 Hamada, F.N., Rosenzweig, M., Kang, K., Pulver, S.R., Ghezzi, A., Jegla, T.J., and  
939 Garrity, P.A. (2008). An internal thermal sensor controlling temperature preference in  
940 *Drosophila*. *Nature* 454, 217-220.

941 Helassa, N., Antonyuk, S.V., Lian, L.Y., Haynes, L.P., and Burgoyne, R.D. (2017).  
942 Biophysical and functional characterization of hippocalcin mutants responsible for  
943 human dystonia. *Hum Mol Genet* 26: 2426-2435.

944 Jenett, A., Rubin, G.M., Ngo, T.T., Shepherd, D., Murphy, C., Dionne, H., Pfeiffer,  
945 B.D., Cavallaro, A., Hall, D., Jeter, J., *et al.* (2012). A GAL4-driver line resource for  
946 *Drosophila* neurobiology. *Cell Rep* 2, 991-1001.

947 Jiang, Y., Pitmon, E., Berry, J., Wolf, F.W., McKenzie, Z., and Lebestky, T.J. (2016).  
948 A Genetic Screen To Assess Dopamine Receptor (DopR1) Dependent Sleep  
949 Regulation in *Drosophila*. *G3 (Bethesda)* 6, 4217-4226.

950 Jo, J., Son, G.H., Winters, B.L., Kim, M.J., Whitcomb, D.J., Dickinson, B.A., Lee,  
951 Y.B., Futai, K., Amici, M., Sheng, M., *et al.* (2010). Muscarinic receptors induce  
952 LTD of NMDAR EPSCs via a mechanism involving hippocalcin, AP2 and PSD-95.  
953 *Nat Neurosci* 13, 1216-1224.

954 Joiner, W.J., Crocker, A., White, B.H., and Sehgal, A. (2006). Sleep in *Drosophila* is  
955 regulated by adult mushroom bodies. *Nature* 441, 757-760.

956 Kamikouchi, A., Inagaki, H.K., Effertz, T., Hendrich, O., Fiala, A., Göpfert, M.C.,  
957 and Ito, K. (2009). The neural basis of *Drosophila* gravity-sensing and hearing.  
958 *Nature* 458, 165-171.

959 Karimi, M., and Perlmutter, J.S. (2015). The role of dopamine and dopaminergic  
960 pathways in dystonia: insights from neuroimaging. *Tremor Other Hyperkinet Mov (N*  
961 *Y)* 5, 280.

962 Kume, K., Kume, S., Park, S.K., Hirsh, J., and Jackson, F.R. (2005). Dopamine is a  
963 regulator of arousal in the fruit fly. *J Neurosci* 25, 7377-7384.

964 Lamaze, A., Ozturk-Colak, A., Fischer, R., Peschel, N., Koh, K., and Jepson, J.E.  
965 (2017). Regulation of sleep plasticity by a thermo-sensitive circuit in *Drosophila*. *Sci*  
966 *Rep* 7, 40304.

967 Lebestky, T., Chang, J.S., Dankert, H., Zelnik, L., Kim, Y.C., Han, K.A., Wolf, F.W.,  
968 Perona, P., and Anderson, D.J. (2009). Two different forms of arousal in *Drosophila*

969 are oppositely regulated by the dopamine D1 receptor ortholog DopR via distinct  
970 neural circuits. *Neuron* 64, 522-536.

971 Lee, H.J., Weitz, A.J., Bernal-Casas, D., Duffy, B.A., Choy, M., Kravitz, A.V.,  
972 Kreitzer, A.C., and Lee, J.H. (2016). Activation of Direct and Indirect Pathway  
973 Medium Spiny Neurons Drives Distinct Brain-wide Responses. *Neuron* 91, 412-424.

974 Lehner, B. (2013). Genotype to phenotype: lessons from model organisms for human  
975 genetics. *Nat Rev Genet* 14, 168-178.

976 Levine, J.D., Funes, P., Dowse, H.B., and Hall, J.C. (2002a). Advanced analysis of a  
977 cryptochrome mutation's effects on the robustness and phase of molecular cycles in  
978 isolated peripheral tissues of *Drosophila*. *BMC neuroscience* 3, 5.

979 Levine, J.D., Funes, P., Dowse, H.B., and Hall, J.C. (2002b). Signal analysis of  
980 behavioral and molecular cycles. *BMC neuroscience* 3, 1.

981 Li, Q., Kellner, D.A., Hatch, H.A.M., Yumita, T., Sanchez, S., Machold, R.P., Frank,  
982 C.A., and Stavropoulos, N. (2017). Conserved properties of *Drosophila insomniac*  
983 link sleep regulation and synaptic function. *PLoS Genet* 13, e1006815.

984 Liu, Q., Liu, S., Kodama, L., Driscoll, M.R., and Wu, M.N. (2012). Two  
985 dopaminergic neurons signal to the dorsal fan-shaped body to promote wakefulness in  
986 *Drosophila*. *Curr Biol* 22, 2114-2123.

987 Liu, S., Lamaze, A., Liu, Q., Tabuchi, M., Yang, Y., Fowler, M., Bharadwaj, R.,  
988 Zhang, J., Bedont, J., Blackshaw, S., *et al.* (2014). WIDE AWAKE mediates the  
989 circadian timing of sleep onset. *Neuron* 82, 151-166.

990 McGary, K.L., Park, T.J., Woods, J.O., Cha, H.J., Wallingford, J.B., and Marcotte,  
991 E.M. (2010). Systematic discovery of nonobvious human disease models through  
992 orthologous phenotypes. *Proc Natl Acad Sci U S A* 107, 6544-6549.

993 Mencacci, N.E., Rubio-Agusti, I., Zdebik, A., Asmus, F., Ludtmann, M.H., Ryten,  
994 M., Plagnol, V., Hauser, A.K., Bandres-Ciga, S., Bettencourt, C., *et al.* (2015). A  
995 missense mutation in KCTD17 causes autosomal dominant myoclonus-dystonia. *Am*  
996 *J Hum Genet* 96, 938-947.

997 Miesenbock, G. (2012). Synapto-pHluorins: genetically encoded reporters of synaptic  
998 transmission. *Cold Spring Harb Protoc* 2012, 213-217.

999 Nitabach, M.N., Blau, J., and Holmes, T.C. (2002). Electrical silencing of *Drosophila*  
1000 pacemaker neurons stops the free-running circadian clock. *Cell* 109, 485-495.

1001 Pappas, S.S., Darr, K., Holley, S.M., Cepeda, C., Mabrouk, O.S., Wong, J.M., LeWitt,  
1002 T.M., Paudel, R., Houlden, H., Kennedy, R.T., *et al.* (2015). Forebrain deletion of the  
1003 dystonia protein torsinA causes dystonic-like movements and loss of striatal  
1004 cholinergic neurons. *Elife* 4, e08352.

1005 Park, D., and Griffith, L.C. (2006). Electrophysiological and anatomical  
1006 characterization of PDF-positive clock neurons in the intact adult *Drosophila* brain. *J*  
1007 *Neurophysiol* 95, 3955-3960.

1008 Peterson, D.A., Sejnowski, T.J., and Poizner, H. (2010). Convergent evidence for  
1009 abnormal striatal synaptic plasticity in dystonia. *Neurobiol Dis* 37, 558-573.

1010 Pfeiffenberger, C., and Allada, R. (2012). Cul3 and the BTB adaptor insomniac are  
1011 key regulators of sleep homeostasis and a dopamine arousal pathway in *Drosophila*.  
1012 *PLoS Genet* 8, e1003003.

1013 Pfeiffenberger, C., Lear, B.C., Keegan, K.P., and Allada, R. (2010a). Locomotor  
1014 activity level monitoring using the *Drosophila* Activity Monitoring (DAM) System.  
1015 *Cold Spring Harb Protoc* 2010, pdb prot5518.

1016 Pfeiffenberger, C., Lear, B.C., Keegan, K.P., and Allada, R. (2010b). Processing sleep  
1017 data created with the *Drosophila* Activity Monitoring (DAM) System. Cold Spring  
1018 Harb Protoc 2010, pdb prot5520.

1019 Pitman, J.L., McGill, J.J., Keegan, K.P., and Allada, R. (2006). A dynamic role for  
1020 the mushroom bodies in promoting sleep in *Drosophila*. Nature 441, 753-756.

1021 Rogulja, D., and Young, M.W. (2012). Control of sleep by cyclin A and its regulator.  
1022 Science 335, 1617-1621.

1023 Seidner, G., Robinson, J.E., Wu, M., Worden, K., Masek, P., Roberts, S.W., Keene,  
1024 A.C., and Joiner, W.J. (2015). Identification of Neurons with a Privileged Role in  
1025 Sleep Homeostasis in *Drosophila melanogaster*. Curr Biol 25, 2928-2938.

1026 Shi, M., Yue, Z., Kuryatov, A., Lindstrom, J.M., and Sehgal, A. (2014). Identification  
1027 of Redeye, a new sleep-regulating protein whose expression is modulated by sleep  
1028 amount. Elife 3, e01473.

1029 Sitaraman, D., Aso, Y., Jin, X., Chen, N., Felix, M., Rubin, G.M., and Nitabach, M.N.  
1030 (2015). Propagation of Homeostatic Sleep Signals by Segregated Synaptic  
1031 Microcircuits of the *Drosophila* Mushroom Body. Curr Biol 25, 2915-2927.

1032 Stavropoulos, N., and Young, M.W. (2011). insomniac and Cullin-3 regulate sleep  
1033 and wakefulness in *Drosophila*. Neuron 72, 964-976.

1034 Tanabe, L.M., Kim, C.E., Alagem, N., and Dauer, W.T. (2009). Primary dystonia:  
1035 molecules and mechanisms. Nat Rev Neurol 5, 598-609.

1036 Tecuapetla, F., Jin, X., Lima, S.Q., and Costa, R.M. (2016). Complementary  
1037 Contributions of Striatal Projection Pathways to Action Initiation and Execution. Cell  
1038 166, 703-715.



- 1039 Teng, D.H., Chen, C.K., and Hurley, J.B. (1994). A highly conserved homologue of  
1040 bovine neurocalcin in *Drosophila melanogaster* is a Ca(2+)-binding protein expressed  
1041 in neuronal tissues. *J Biol Chem* 269, 31900-31907.
- 1042 Tomita, J., Ban, G., and Kume, K. (2017). Genes and neural circuits for sleep of the  
1043 fruit fly. *Neurosci Res* 118, 82-91.
- 1044 Tomita, J., Ueno, T., Mitsuyoshi, M., Kume, S., and Kume, K. (2015). The NMDA  
1045 Receptor Promotes Sleep in the Fruit Fly, *Drosophila melanogaster*. *PLoS One* 10,  
1046 e0128101.
- 1047 Tzingounis, A.V., Kobayashi, M., Takamatsu, K., and Nicoll, R.A. (2007).  
1048 Hippocalcin gates the calcium activation of the slow afterhyperpolarization in  
1049 hippocampal pyramidal cells. *Neuron* 53, 487-493.
- 1050 Ueno, K., Naganos, S., Hirano, Y., Horiuchi, J., and Saitoe, M. (2013). Long-term  
1051 enhancement of synaptic transmission between antennal lobe and mushroom body in  
1052 cultured *Drosophila* brain. *J Physiol* 591, 287-302.
- 1053 Ueno, T., Tomita, J., Tanimoto, H., Endo, K., Ito, K., Kume, S., and Kume, K. (2012).  
1054 Identification of a dopamine pathway that regulates sleep and arousal in *Drosophila*.  
1055 *Nat Neurosci* 15, 1516-1523.
- 1056 Wakabayashi-Ito, N., Ajjuri, R.R., Henderson, B.W., Doherty, O.M., Breakefield,  
1057 X.O., O'Donnell, J.M., and Ito, N. (2015). Mutant human torsinA, responsible for  
1058 early-onset dystonia, dominantly suppresses GTPCH expression, dopamine levels and  
1059 locomotion in *Drosophila melanogaster*. *Biol Open* 4, 585-595.
- 1060 Wakabayashi-Ito, N., Doherty, O.M., Moriyama, H., Breakefield, X.O., Gusella, J.F.,  
1061 O'Donnell, J.M., and Ito, N. (2011). Dtorsin, the *Drosophila* ortholog of the early-  
1062 onset dystonia TOR1A (DYT1), plays a novel role in dopamine metabolism. *PLoS*  
1063 *One* 6, e26183.

1064 Weisheit, C.E., and Dauer, W.T. (2015). A novel conditional knock-in approach  
1065 defines molecular and circuit effects of the DYT1 dystonia mutation. *Hum Mol Genet*  
1066 *24*, 6459-6472.

1067 Wenning, G.K., Kiechl, S., Seppi, K., Muller, J., Hogg, B., Saletu, M., Rungger, G.,  
1068 Gasperi, A., Willeit, J., and Poewe, W. (2005). Prevalence of movement disorders in  
1069 men and women aged 50-89 years (Bruneck Study cohort): a population-based study.  
1070 *Lancet Neurol* *4*, 815-820.

1071 Wu, M., Robinson, J.E., and Joiner, W.J. (2014). SLEEPLESS is a bifunctional  
1072 regulator of excitability and cholinergic synaptic transmission. *Curr Biol* *24*, 621-629.

1073 Yokoi, F., Dang, M.T., Liu, J., Gandre, J.R., Kwon, K., Yuen, R., and Li, Y. (2015).  
1074 Decreased dopamine receptor 1 activity and impaired motor-skill transfer in Dyt1  
1075 DeltaGAG heterozygous knock-in mice. *Behav Brain Res* *279*, 202-210.

1076 Zhong, L., Bellemer, A., Yan, H., Ken, H., Jessica, R., Hwang, R.Y., Pitt, G.S., and  
1077 Tracey, W.D. (2012). Thermosensory and nonthermosensory isoforms of *Drosophila*  
1078 *melanogaster* TRPA1 reveal heat-sensor domains of a thermoTRP Channel. *Cell Rep*  
1079 *1*, 43-55.

1080

1081
